# Supplementary material for: Efficacy and safety of the Shexiang Baoxin Pill for the treatment of coronary artery disease not amenable to revascularisation: study protocol for a randomised, placebo-controlled, double-blinded trial
Source: PubMed Central journal article supplement — BMJ Open. 2018 Feb 14;8(2):e018052. doi: 10.1136/bmjopen-2017-018052 (PMC5829656; doi:10.1136/bmjopen-2017-018052), 2018-02-14
Supplement: bmjopen-2017-018052.draft_revisions.pdf [file bmjopen-2017-018052.draft_revisions.pdf]

# BMJ Open

BMJ Open is committed to open peer review. As part of this commitment we make the peer review history of every article we publish publicly available.

When an article is published we post the peer reviewers' comments and the authors' responses online. We also post the versions of the paper that were used during peer review. These are the versions that the peer review comments apply to.

The versions of the paper that follow are the versions that were submitted during the peer review process. They are not the versions of record or the final published versions. They should not be cited or distributed as the published version of this manuscript.

BMJ Open is an open access journal and the full, final, typeset and author-corrected version of record of the manuscript is available on our site with no access controls, subscription charges or pay-per-view fees (<http://bmjopen.bmj.com>).

If you have any questions on BMJ Open's open peer review process please email [editorial.bmjopen@bmj.com](mailto:editorial.bmjopen@bmj.com)

# BMJ Open

## **Efficacy and safety of Shexiang Baoxin Pill on coronary artery disease not amenable to revascularization: study protocol for a randomised, placebo-controlled, double-blinded trial.**

|                                 |                                                                                                                                                                                                                                    |
|---------------------------------|------------------------------------------------------------------------------------------------------------------------------------------------------------------------------------------------------------------------------------|
| Journal:                        | <i>BMJ Open</i>                                                                                                                                                                                                                    |
| Manuscript ID                   | bmjopen-2017-018052                                                                                                                                                                                                                |
| Article Type:                   | Protocol                                                                                                                                                                                                                           |
| Date Submitted by the Author:   | 07-Jun-2017                                                                                                                                                                                                                        |
| Complete List of Authors:       | Tian, Panpan; Beijing University of Traditional Chinese Medicine<br>Li, Jun; Guang'anmen Hospital<br>Gao, Jian; Beijing University of Traditional Chinese Medicine<br>Li, Ying; Beijing University of Traditional Chinese Medicine |
| <b>Primary Subject Heading</b>: | Cardiovascular medicine                                                                                                                                                                                                            |
| Secondary Subject Heading:      | Cardiovascular medicine                                                                                                                                                                                                            |
| Keywords:                       | coronary artery disease, revascularization, Shexiang Baoxin Pill, randomised controlled trial                                                                                                                                      |
|                                 |                                                                                                                                                                                                                                    |

SCHOLARONE™  
Manuscripts

1  
2  
3  
4 **Efficacy and safety of Shexiang Baoxin Pill on coronary artery**  
5  
6 **disease not amenable to revascularization: study protocol for a**  
7  
8 **randomised, placebo-controlled, double-blinded trial.**  
9

10 **Authors** Pan-pan Tian<sup>1</sup>, Jun Li(Corresponding Author, 100053,  
11 [2495149023@qq.com](mailto:2495149023@qq.com), +86 15652388175 ), Jian Gao<sup>2</sup>, Ying Li<sup>2</sup>  
12  
13  
14

15 **Keywords** Coronary artery disease; revascularization; Shexiang Baoxin  
16  
17  
18  
19  
20  
21  
22  
23  
24  
25  
26  
27  
28  
29  
30  
31  
32  
33  
34  
35  
36  
37  
38  
39  
40  
41  
42  
43  
44  
45  
46  
47  
48  
49  
50  
51  
52  
53  
54  
55  
56  
57  
58  
59  
60  
Pill; randomised controlled trial.

**Word count** About 2767 words.

**ABSTRACT**

**Introduction:** Coronary artery disease (CAD) is a common disease with high incidence and mortality rate around the world. CAD not amenable to revascularization mainly indicates that the coronary arteries have severe diffuse lesion, calcification, or CAD complicated with severe multiple organ disease. Currently, the western medicine treatment for CAD not amenable to revascularization is limited. Shexiang Baoxin Pill (SBP), a kind of Chinese patent medicine, has been widely used for treating CAD in China for many years. Numerous researches have identified that SBP can improve myocardial ischemia and promote therapeutic angiogenesis. However, whether SBP is effective in treating CAD not amenable to revascularization is still unknown. This study aims to evaluate the efficacy and safety of SBP in patients with CAD not amenable to revascularization.

1  
2  
3 **Methods and analysis:** This is a multicentre, placebo-controlled,  
4 double-blinded, randomised controlled clinical trial. A total of 440  
5 participants are randomly allocated to two groups: the intervention group  
6 and the placebo group. On the basis of conventional western medicine  
7 treatment, the intervention group is treated by SBP, and the placebo group  
8 is treated by SBP placebo. The patients is treated by either SBP or  
9 placebo three times daily for 24 weeks. The primary outcomes include  
10 major adverse cardiovascular events (including myocardial infarction,  
11 mortality and other unexpected incidents). The secondary outcomes  
12 include C-reactive protein, B-type natriuretic peptide, electrocardiogram,  
13 echocardiographic parameters (ejection fraction percentage, E/A ratio),  
14 and hospital readmission rates due to CAD. The assessment is performed  
15 at baseline (before randomisation), and 24 weeks after randomisation.  
16  
17  
18  
19  
20  
21  
22  
23  
24  
25  
26  
27  
28  
29  
30  
31  
32  
33

34  
35 **Ethics and dissemination:** The protocol has been approved by the  
36 Research Ethical Committee of Guang'anmen Hospital, China Academy  
37 of Chinese Medical Sciences, Beijing, China (reference:  
38 2016-129-KY-01). The trial will be helpful in identifying the efficacy and  
39 safety of SBP on coronary heart disease not amenable to  
40 revascularization.  
41  
42  
43  
44  
45  
46  
47  
48  
49

50 **Trial registration number:** NCT03072121.  
51

## 52 **BACKGROUND**

53

54 Coronary artery disease (CAD) is a narrowing or blockage of the  
55  
56  
57  
58  
59  
60

1  
2  
3 arteries and vessels that provide oxygen and blood to the heart. It is the  
4  
5 leading cause of death among 235 causes of death in human currently and  
6  
7 kills more than 7 million people annually worldwide and will  
8  
9 continuously be ranked as the top cause of death in next 20 years  
10  
11 according the prediction <sup>[1]</sup>. CAD not amenable to revascularization  
12  
13 mainly refers to the left main coronary artery and three-vessel severe  
14  
15 diffuse stenosis, calcification or dilated lesions, or CAD complicated with  
16  
17 severe multiple organ disease such as severe heart failure, infection,  
18  
19 blood diseases, cancer cachexia, lung dysfunction or renal insufficiency  
20  
21 <sup>[2]</sup>. Currently, the main treatment methods for CAD include lifestyle  
22  
23 changes, medical treatment (cholesterol lowering medications,  
24  
25 beta-blockers, nitroglycerin, calcium antagonists, etc), coronary  
26  
27 interventions and surgery <sup>[3-5]</sup>. Among these treatments, coronary  
28  
29 revascularization including PCI and CABG is an advanced effective  
30  
31 therapeutic method for CAD, especially for acute coronary syndrome.  
32  
33 However, there are about 5-10% CAD patients because of their sever and  
34  
35 diffuse coronary disease, it's not eligible for revascularization, besides  
36  
37 the conventional western medicine therapy don't work well on them <sup>[2]</sup>.  
38  
39 Even Medicare has no classification code for those patients with CAD not  
40  
41 amenable to revascularization, and the United States Task Force  
42  
43 addressing this situation stresses the urgent need for studies<sup>[6]</sup>.  
44  
45  
46  
47  
48  
49  
50  
51  
52  
53  
54  
55  
56  
57  
58  
59  
60

1  
2  
3  
4 Chinese herbal medicine (CHM), as one kind of popular  
5  
6 complementary and alternative medicine, plays an important role in  
7  
8 treating CAD in China. According to the theory of traditional Chinese  
9  
10 medicine (TCM), all the related symptoms and signs in a certain disease  
11  
12 phase are generalized to a syndrome ('*Zheng*' in Chinese medicine),  
13  
14 which is the basic unit and key concept of TCM [7]. Patients with CAD  
15  
16 can be divided into different syndromes. In the diagnosis of CAD, the '*Qi*  
17  
18 deficiency and blood stasis syndrome' is an important type diagnosed  
19  
20 from the viewpoint of TCM and our previous clinical practice [8].  
21  
22 Therefore, the principle of 'tonifying *Qi* and activating blood'' is applied  
23  
24 in the treatment of CAD not amenable to revascularization. Shexiang  
25  
26 Baoxin pill (SBP), one kind of Chinese patent medicine, originates from  
27  
28 Suhexiang pill documented in Prescription of Peaceful Benevolent  
29  
30 Dispensary (*Taiping Huimin Hejiju Fang*) in the Song Dynasty. It  
31  
32 consists of seven herbal medicines, including Musk (*Moschus*, *Shexiang*),  
33  
34 Ginseng Root (*Radix Ginseng*, *Renshen*), Cow-bezoar (*Calculus Bovis*,  
35  
36 *Niuhuang*), Storax (*Styrax*, *Suhexiang*), Cassia Bark (*Cortex Cinnamomi*,  
37  
38 *Rougui*), Toad Venom (*Venenum Bufonis*, *Chansu*), and Borneol  
39  
40 (*Borneolum Syntheticum*, *Bingpian*). It has been widely used for treating  
41  
42 CAD in China for many years. Modern researches have indicated that the  
43  
44 major pharmacological mechanisms of SBP include improving  
45  
46 endothelial cell function, inhibiting the reaction of vascular inflammation  
47  
48  
49  
50  
51  
52  
53  
54  
55  
56  
57  
58  
59  
60

1  
2  
3 through decreasing the level of C reactive protein and plasma  
4 homocysteine, stabilizing atherosclerotic plaque, promoting therapeutic  
5 angiogenesis, inhibiting the abnormal proliferation of vascular smooth  
6 muscle cells, reversing myocardial fibrosis, dilating coronary arteries,  
7 improving myocardial ischemia and reducing Myocardial infarct range  
8 [9-12]. Clinical studies found that long-term SBP administration could  
9 reduce the occurrence of angina pectoris events and some other clinical  
10 events, and cut down the dosage of nitrates used in patients with stable  
11 angina pectoris [13-14]. However, whether SBP is effective on treating CAD  
12 not amenable to revascularization is still unknown. The aim of this  
13 multicentre, randomised, double-blind, placebo controlled trial is to  
14 evaluate the efficacy and safety of Shexiang Baoxin pill in patients with  
15 CAD not amenable to revascularization.  
16  
17  
18  
19  
20  
21  
22  
23  
24  
25  
26  
27  
28  
29  
30  
31  
32  
33  
34

## 35 **METHODS/DESIGN**

### 36 **Ethics**

37  
38 The study was approved by the Research Ethical Committee of  
39 Guang'anmen Hospital, China Academy of Chinese Medical Sciences,  
40 Beijing, China (reference: 2016-129-KY-01).  
41  
42  
43  
44  
45  
46  
47

### 48 **Study population**

49  
50 A total of 440 patients are recruited from 7 centres: Wangjing  
51 Hospital, China Academy of Chinese Medical Sciences; Beijing Anzhen  
52 Hospital; The Second Affiliated Hospital of Henan University of  
53  
54  
55  
56  
57  
58  
59  
60

1  
2  
3 Traditional Chinese Medicine; Guangdong Provincial Hospital of  
4  
5  
6 Traditional Chinese Medicine; Shandong University of Traditional  
7  
8 Chinese Medicine; Shaanxi Hospital of Traditional Chinese Medicine.  
9  
10 The trial is executed from June 2017 to February 2019.

### 13 **Recruitment of participants**

15  
16 Two strategies are used to recruit patients with CAD not amenable to  
17  
18 revascularization. Firstly, we display recruitment posters outside the  
19  
20 clinics. The posters contain brief introductions about the population  
21  
22 needed, the medicine offered to eligible participants, and the contact  
23  
24 information of the researcher. Secondly, we recruit participants in  
25  
26 outpatient clinics from *Wangjing* Hospital, China Academy of Chinese  
27  
28 Medical Sciences; *Beijing Anzhen* Hospital; The Second Affiliated  
29  
30 Hospital of *Henan* University of Traditional Chinese Medicine;  
31  
32 *Guangdong* Provincial Hospital of Traditional Chinese Medicine;  
33  
34 *Shandong* University of Traditional Chinese Medicine; *Shaanxi* Hospital  
35  
36 of Traditional Chinese Medicine. The patients that meet the study criteria  
37  
38 will be requested to sign a written informed consent. They are also given  
39  
40 enough time to decide whether they are willing to participate in the trial  
41  
42 or not.  
43  
44  
45  
46  
47  
48  
49

### 50 **Inclusion criteria**

51  
52 Participants are included if they meet these requirements: aged  
53  
54 between 45 and 75 years, diagnosed with sever CAD through coronary  
55  
56



arteriography which shows that the left main coronary artery and three-vessel have severe diffuse stenosis, calcification or vascular ectasia, and be in accordance with TCM syndrome type “*Qi* deficiency and blood stasis syndrome”. Western medicine diagnostic criteria refer to “Guidelines for the Prevention and Management of Chronic Stable Angina in China”<sup>[15]</sup> (2007 edition), “Guidelines for the Diagnosis and Management of Non-ST-segment Elevation Myocardial Infarction Acute Coronary Syndromes”<sup>[16]</sup> (2012 edition), “Guidelines for the Diagnosis and Management of Acute ST-segment Elevation Myocardial Infarction”<sup>[17]</sup> (2010 edition), which were made by Cardiology Branch of Chinese Medical Association. And TCM diagnostic criteria refer to “Guideline of Clinical Research of New Drugs of Traditional Chinese Medicine·Chest Obstruction”<sup>[18]</sup> (2002 edition). Finally, it’s decided by both cardiologists and cardiac surgeons whether the CAD patients are in accordance with the inclusive criteria.

### **Exclusion criteria**

The exclusion criteria are listed as below: a) patients with severe valvular disease, congenital cardiomyopathy discompensation; b) patients with CAD complicated with severe multiple organ disease such as severe heart failure, severe lung, liver or renal dysfunction, peptic ulcer in active stage, or intracranial hemorrhage; c) patients that use high-dose steroids due to connective tissue disease; d) patients with serious infections; e)

1  
2  
3 patients with malignant tumor; f) patients with hematopoietic diseases. g)  
4  
5 pregnant or lactating women.  
6  
7

### 8 **Handling of withdrawal and data management**

9  
10 Participants may withdraw from the study at any time for any reason.  
11  
12 If any patients want to withdraw, clinicians should ask whether they  
13  
14 would be willing to complete the assessments according to the study  
15  
16 schedule and write down their last time of taking the medicine.  
17  
18 Incidences of patients loss to follow-up and withdrawal will be recorded  
19  
20 and reported. The data collected in this trial comprises information  
21  
22 recorded in case report forms. When every visits completed at each centre,  
23  
24 data will be entered using the double entry method.  
25  
26  
27  
28  
29

### 30 **Interventions**

31  
32 In addition to conventional western medicine treatment including  
33  
34 antiplatelet, lipid-lowering, antihypertensive or anti-diabetic therapy,  
35  
36 eligible patients will be allocated to receive SBP or placebo for 24  
37  
38 successive weeks. The SBP and placebo were produced and packed in a  
39  
40 single batch (Production batch number: 160299) by  
41  
42 Shanghai Hutchison Pharmaceuticals Limited, Shanghai, China. The test  
43  
44 results of drug quality were consistent with the Chinese Medicine  
45  
46 Standards of the State Food and Drug Administration (SFDA). The  
47  
48 placebo pills have the identical appearance, smell, and scent as the active  
49  
50 treatment pills. Patients will take the pills orally three times daily for 24  
51  
52  
53  
54  
55  
56  
57  
58  
59  
60

1  
2  
3 successive weeks. Any other Chinese herbal decoction or Chinese patent  
4  
5  
6 medicine for treating CAD is prohibited during the study.  
7

### 8 **Randomisation and blinding**

9

10 Randomisation is performed by an independent statistician. The  
11  
12 randomisation sequence (blocked, stratified for centres) is generated by  
13  
14 use of SAS 9.4 software. Each centre receives consecutively coded drugs.  
15  
16 All of the drugs provided by the pharmaceutical company are numbered  
17  
18 with a label according to the randomisation schedule. This trial is a  
19  
20 double-blind trial. The first level is for the case number corresponding to  
21  
22 groups (group A and group B), and the second level is for the group  
23  
24 corresponding to the intervention (the intervention and placebo groups).  
25  
26 The numbers are kept in opaque sealed envelopes. The double levels of  
27  
28 blinding are sealed separately and given to the leader of the clinical  
29  
30 research. Emergency letters are sent to each of the centres, saved with the  
31  
32 test drug, and properly preserved until the end of the trial. Treatment  
33  
34 assignments are not revealed and are blinded to the patients and  
35  
36 investigators (including statisticians) until the entire study is completed.  
37  
38  
39  
40  
41  
42  
43  
44  
45 Time points are as shown in Figure 1.  
46  
47  
48  
49  
50  
51  
52  
53  
54  
55  
56  
57  
58  
59  
60

Figure 1 Flow chart.

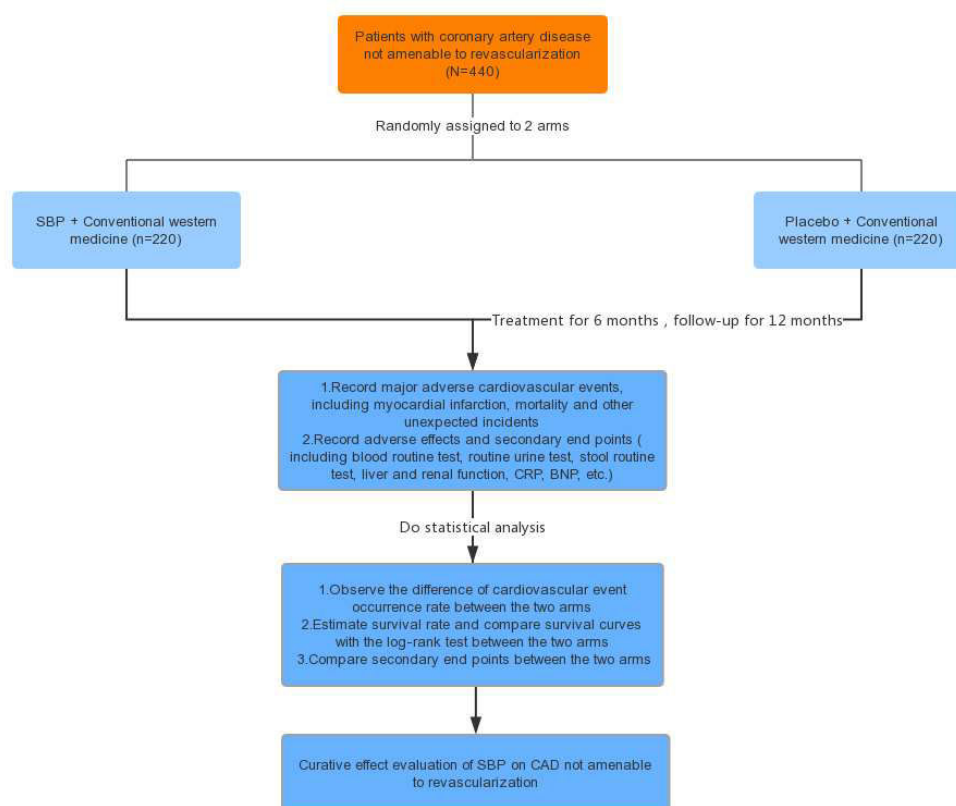

### Primary outcomes

The primary outcomes include major adverse cardiovascular events (including myocardial infarction, mortality and other unexpected incidents).

### Secondary outcomes

The secondary outcomes include C-reactive protein, B-type natriuretic peptide, electrocardiogram, echocardiographic parameters (EF %, E/A ratio), and hospital readmission rates due to CAD.

### Safety outcomes

Safety outcomes include: measurement of the vital signs:

1  
2  
3 temperature, blood pressure, respirations, heart rate; b) the routine blood  
4 test, routine urine test, routine stool test; c) blood lipids test, blood  
5 glucose test; d) liver function test (ALT, AST,  $\gamma$ -GT, ALP, TBIL), renal  
6 function test (BUN, Cr); e) electrocardiogram; f) recording adverse  
7 events at any time.  
8  
9

10  
11  
12  
13  
14  
15  
16 These biological indicators are monitored since these patients are  
17 grouped until the end of the follow-up.  
18

### 19 20 21 **Adverse events**

22  
23 Any unexpected symptom, vital sign or sickness, as long as they  
24 cause discomfort, will be recorded as an adverse event. The starting date,  
25 ending date, degree, relations with the trial medicine, and whether they  
26 drop out of the study will be recorded correspondingly. Severe adverse  
27 events are required to be reported to the leader of the trial, ethics  
28 committees and sponsors within 24h, and participants will be provided  
29 with every necessary treatment. If the adverse event still exists, the  
30 follow-up will continue until the adverse event disappears.  
31  
32  
33  
34  
35  
36  
37  
38  
39  
40  
41

### 42 43 **Sample size**

44  
45 The incidence of major adverse cardiovascular events will be  
46 compared between both groups. The sample size is calculated using the  
47 concept of efficiency as presented by Xie<sup>[19]</sup>. The efficiency is 80% in the  
48 intervention group and 60% in the placebo group, respectively, as a  
49 previous study has suggested. The following formula is used for a  
50  
51  
52  
53  
54  
55  
56  
57  
58  
59  
60

two-group trial:

$$n = (U_{\alpha} + U_{\beta})^2 2P(1 - P)/(P_1 - P_0)$$

On the basis of  $\alpha=0.05$ ,  $\beta=0.2$ , the required sample size per group is approximately 90 participants for each group. Allowing for 15% attrition, we should recruit 208 participants, with 104 in each group. Data analysis will be conducted by statisticians who are independent from the research team. An intent-to-treat analysis (ITT) for the patients, who have received treatment at least once, will be carried out. Missing data will be adjusted using the last observation carried forward method. The per-protocol analysis will be restricted to participants who strictly follow the protocol and complete the study. We will build up the database with the software Excel. The raw data are typed in computers by two statisticians independently. Every analysis is conducted using the SPSS software (SPSS 26.0). We calculate frequency and percentage of variables with Descriptive statistics program. Pearson's  $\chi^2$  test will be performed on categorical variables, Student's t test on measurement variables. Log-rank test is used to assess the difference between the survival distributions of two groups with respect to some failure-time outcome.

## DISCUSSION

Coronary artery disease has become a frequently-occurring and common disease in elderly people in many countries. With the rapid increase of diabetes and obesity patients, patients with CAD not

1  
2  
3  
4 amenable to revascularization is expected to increase exponentially<sup>[20]</sup>. In  
5  
6 a contemporary series of patients undergoing coronary angiography,  
7  
8 28.8% of patients had significant CAD and did not undergo complete  
9  
10 revascularization, including 12.8% partially revascularized, 9.3%  
11  
12 managed medically, and 6.7% with "no-option". These patients had  
13  
14 higher mortality at 3 years when compared with completely  
15  
16 revascularized patients<sup>[21]</sup>.  
17  
18  
19

20  
21 In the treatment of CAD, antiplatelet therapy is the cornerstone. It's  
22  
23 very important in the prevention of acute, subacute thrombosis and severe  
24  
25 cardiovascular events. Currently, aspirin and clopidogrel are the most  
26  
27 commonly used antiplatelet drugs. Aspirin is playing an important role in  
28  
29 the acute phase, primary and secondary prevention of CAD. Clopidogrel  
30  
31 is safe and effective in reducing acute coronary syndrome and ischemic  
32  
33 events in percutaneous coronary intervention patients. And dual therapy  
34  
35 with aspirin and clopidogrel has emerged as the gold standard therapy for  
36  
37 patients treated with drug-eluting stents. However, there is variability in  
38  
39 patients' responses to this antiplatelet therapy. Studies have identified that  
40  
41 of the patients with CAD, 5%~45% were aspirin resistant, 4%~30% were  
42  
43 clopidogrel resistant, 10% were both resistant<sup>[22]</sup>. Besides, medication  
44  
45 compliance of patients is another problem. The middle-aged and elderly  
46  
47 are the high-risk groups of CAD. The elderly patients with CAD are  
48  
49 always combined with hypertension, diabetes, hyperlipidemia, cerebral  
50  
51  
52  
53  
54  
55  
56  
57  
58  
59  
60

1  
2  
3 infarction, obstructive pulmonary disease and so on. Lifelong medication  
4 is necessary for them to control disease development. However, more  
5 than 60% of elders fail to adhere to their medication regimen due to too  
6 many drugs but insufficient relief of symptoms [23]. Therefore, it's  
7 necessary to identify other safe and effective treatment methods that can  
8 alleviate the symptoms and improve the quality of CAD patients' life.  
9

10  
11  
12  
13  
14  
15  
16  
17  
18 As one of the alternative and complementary medicine, Chinese herb  
19 medicine is attracting more and more people's attention [24-25]. A large  
20 number of traditional Chinese medicine researches have implied that  
21 either single traditional Chinese medicine or compound preparations  
22 both have the multiple target effect in the prevention and treatment of  
23 cardiovascular disease [26-27]. The composition of Chinese herbal  
24 compound is more complicated. It can intervene in each link of the  
25 disease occurrence and development. The synthetical effects of the  
26 multiple targets reflect the advantages of traditional Chinese Herb  
27 Medicine [28-29].  
28  
29  
30  
31  
32  
33  
34  
35  
36  
37  
38  
39  
40  
41

42  
43 Treatment with syndrome differentiation is one of the characteristics  
44 of TCM theoretical system. *Qi* deficiency and blood stasis syndrome is  
45 the core pathogenesis of CAD [30-31]. SBP as a kind of Chinese patent  
46 medicine has the effect of Supplementing *Qi* and activating blood which  
47 is consistent with the core pathogenesis. Numerous studies have  
48 identified the efficacy and safety of SBP on treating CAD. However,  
49  
50  
51  
52  
53  
54  
55  
56  
57  
58  
59  
60



1  
2  
3 among these researches, most studies were about clinical experience, case  
4 reports, case series, experts' opinions. Large sample, prospective,  
5 randomized controlled studies on treatment are scarce<sup>[32]</sup>. Whether SBP  
6 is effective in treating CAD not amenable to revascularization still need  
7 to be confirmed by evidence medical research through large samples,  
8 multi-center, randomised controlled clinical trials. To facilitate  
9 appropriate high-quality methodology and strict quality control, this  
10 protocol has been developed according to the CONSORT statement<sup>[33]</sup>.  
11 This is a randomized double-blind parallel controlled multiple-centered  
12 clinical study design. It may be significant to improve the prognosis and  
13 quality of life of patients.  
14  
15  
16  
17  
18  
19  
20  
21  
22  
23  
24  
25  
26  
27  
28  
29

30 There are also some limitations that need to be taken into account in  
31 this study. Due to the restriction of research project funds and period, the  
32 treatment duration is so short that more RCTs with long term follow-up  
33 are wanted to determine the efficacy and safety of SBP in the future  
34 study.  
35  
36  
37  
38  
39  
40  
41  
42

43 **Contributors** Jun Li are the principal investigators of this study.  
44 Panpan Tian wrote the first draft of the manuscript. Jun Li involved in  
45 program design and modifying articles. Ying Li and Jian Gao contributed  
46 to the statistical acquisition and analysis of data. All authors revised the  
47 protocol critically for important intellectual content and approved the  
48 final manuscript.  
49  
50  
51  
52  
53  
54  
55  
56

1  
2  
3  
4 **Competing interests** None declared.

5  
6 **Funding** Provided by China Academy of Traditional Chinese Medicine.

7  
8 **Data sharing** No additional unpublished data are available.

9  
10  
11  
12  
13 **REFERENCES:**

- 14  
15 [1]. Zhao D, Why dentists need to learn the epidemiological status and prevention  
16 strategy of coronary heart disease in China. *Chin J Stomatol* 2016; 51(07): 385-386.
- 17  
18 [2]. Yang TH. Treatment strategy of coronary heart disease not amenable to  
19 re-vascularization. [W082584]. <http://www.365heart.com/show/82584.shtml>  
20 2012-11-5 13:56:18
- 21  
22 [3]. Luo L. The research progress of treatment methods for coronary heart disease.  
23 *Public Medical Forum Magazine* 2013;17(25):3363-66. Chinese.
- 24  
25 [4]. Zhang Y, Tang HQ, Li J. Meta-analysis on curative effect and safety of Shexiang  
26 Baoxin Wan in treatment of coronary heart disease, *Chin J Evid Based Cardiovasc*  
27 *Med* 2012;4(1):13-17. Chinese.
- 28  
29 [5]. Sun HH, Optimal treatment of multi-vessel complex coronary artery disease:[D]  
30 Shandong University, 2014.
- 31  
32 [6]. Lozano I, Capin E, de la Hera JM, et al. Diffuse Coronary Artery Disease Not  
33 Amenable to Revascularization: Long-term Prognosis. *Rev Esp Cardiol (Engl*  
34 *Ed)*. 2015 Jul;68(7):631-3. doi: 10.1016/j.rec.2015.02.013. Epub 2015 Apr 27.
- 35  
36 [7] Jiang M, Zhang C, Zheng G, et al. Traditional Chinese medicine Zheng in the era  
37 of evidence-based medicine: a literature analysis. *Evid Based Complement Alternat*  
38 *Med* 2012;2012:409568.
- 39  
40 [8]. Bi YF, Mao JY, Wang XL, et al. Clinical epidemiology survey of the traditional  
41 Chinese medicine etiology syndrome differentiation of coronary artery disease:  
42 study protocol of a multicenter trial. *Journal of Chinese Integrative Medicine*  
43 2012;10(6): 619-627.
- 44  
45 [9]. Li WY, Shen JP. Research on mechanism of Shexiang Baoxin Pill in the treatment  
46  
47  
48  
49  
50  
51  
52  
53  
54  
55  
56  
57  
58  
59  
60

- 1  
2  
3 of coronary heart disease. *Journal of Emergency in Traditional Chinese Medicine*  
4 2011; 20(1):114-115. Chinese.  
5  
6  
7 [10]. Liu Q, Lv C, Zhang WD, et al. Research progress of Shexiang Baoxin Pill.  
8 *Chinese Traditional and Herbal Drugs* 2016;47(8):1409-1417  
9  
10 [11]. Zhang XZ, Hou YM, Ou ZH. Effect of Shexiang Baoxin pill on coronary  
11 vasodilation by analysis of coronary angiography. *Chin J Integr*  
12 *Med* 2014;34(12):1432-5.  
13  
14 [12]. Chen ZI, Gu N. Mechanism research of Shexiang Baoxin pill on treating  
15 coronary artery disease. *Jilin Journal of Traditional Chinese Medicine*  
16 2011;31(3):262-263.  
17  
18 [13]. Zhu H, Luo XP, Wang LJ. Evaluation on clinical effect of long-term shexiang  
19 baoxin pill administration for treatment of coronary heart disease. *Chin J Integr Med*  
20 2010;30(5):474-7. Chinese.  
21  
22 [14]. Lv JW, Wang JL, Qi H. Curative effect observation of Shexiang Baoxin Pill  
23 on multi-vessel lesions in CAD without revascularization. *Chinese Journal of*  
24 *Integrative Medicine on CAR* 2015;13(10):1015-1516. Chinese.  
25  
26 [15]. Cardiology Branch of Chinese Medical Association, Editor Committee of  
27 Chinese Journal of Cardiology. Chinese guidelines for the prevention and  
28 management of chronic stable angina. *Chinese Journal of Cardiology*. 2007; 35(3):  
29 195-204. Chinese.  
30  
31 [16]. Cardiology Branch of Chinese Medical Association, Editor Committee of  
32 Chinese Journal of Cardiology. Guidelines for the diagnosis and management of  
33 non-ST-segment elevation myocardial infarction Acute Coronary Syndromes.  
34 *Chinese Journal of Cardiology*. 2012; 40(5): 353-367. Chinese.  
35  
36 [17]. Cardiology Branch of Chinese Medical Association, Editor Committee of  
37 Chinese Journal of Cardiology. Guidelines for the diagnosis and management of  
38 acute ST-segment elevation myocardial infarction. *Chinese Journal of Cardiology*.  
39 2010; 38(8): 675-690. Chinese.  
40  
41 [18]. Zheng XY. Guideline of Clinical Research of New Drugs of Traditional Chinese  
42 Medicine: Chest Obstruction. 2002; China Medical Science and  
43  
44  
45  
46  
47  
48  
49  
50  
51  
52  
53  
54  
55  
56  
57  
58  
59  
60

- 1  
2  
3 Technology Press.68-73. Chinese.  
4
- 5 [19]. Xie H. Heart of Musk Pill Combined Western Medicine Therapy of Coronary  
6 Heart Disease Unstable Angina Random Parallel Control Study. Journal of practical  
7 Traditional Chinese Internal Medicine 2014;28(5):105-106  
8  
9
- 10 [20]. Gupta S1, Pressman GS, Morris DL,et al. Distribution of left ventricular ejection  
11 fraction in angina patients with severe coronary artery disease not amenable to  
12 revascularization. Coron Artery Dis. 2010 Aug;21(5):278-80. doi:  
13 10.1097/MCA.0b013e32833bdf53.  
14  
15
- 16 [21]. Williams B1, Menon M, Satran D, et al. Patients with coronary artery disease  
17 not amenable to traditional revascularization: prevalence and 3-year mortality.  
18 Catheter Cardiovasc Interv. 2010 May 1;75(6):886-91. doi: 10.1002/ccd.22431.  
19  
20
- 21 [22]. Gu LY, Sun ZX. Progress of studies on aspirin resistance and clopidogrel  
22 resistance [J]. Chinese Journal of Hospital pharmacy, 2016, (10): 866-869. Chinese  
23  
24
- 25 [23]. Ma H J, Yen M, Chen C H. Determinants of the medication adherence behavior  
26 among elderly patients with coronary heart diseases [J]. Journal of Nursing  
27 Education & Practice, 2015, 5(7).  
28  
29
- 30 [24]. Xiong XJ. Integrating traditional Chinese medicine into Western cardiovascular  
31 medicine: an evidence-based approach. Nat Rev Cardiol 2015; 12: e374.  
32  
33
- 34 [25]. Xiong XJ, Wang Z, Wang J. Innovative strategy in treating angina pectoris with  
35 Chinese patent medicines by promoting blood circulation and removing  
36 blood stasis: experience from combination therapy in Chinese medicine. Curr Vasc  
37 Pharmacol 2015; 13: 540-553.  
38  
39
- 40 [26]. Xiong XJ, Borrelli F, Ferreira AS, Ashfaq T, Feng B. Herbal medicines for  
41 cardiovascular diseases. Evid Based Complement Alternat Med 2014; 2014:  
42 e809741.  
43  
44
- 45 [27]. Qian WD, Xiong XJ, Fang ZY, Lu HT, Wang ZS. Protective effect of  
46 Tetramethylpyrazine on myocardial ischemia-reperfusion injury. Evid Based  
47 Complement Alternat Med 2014; 2014: e107501. (Corresponding Author) (MDLinx:  
48 Featured Article)  
49  
50
- 51 [28]. Zhang H, Zhu HY. New interpretation of the advantages of traditional Chinese  
52  
53  
54  
55  
56  
57  
58  
59  
60

1  
2  
3 medicine in the treatment of cardiovascular disease [J]. Chin Arch Tradit Chin Med,  
4 2001,(03):214-222. Chinese

5  
6  
7 [29]. Liu HX, Liu P. Clinical characteristic advantage of traditional Chinese medicine  
8 in prevention and treatment of cardiovascular disease [J]. Beijing Journal of TCM,  
9 2007,(07):396-399. Chinese

10  
11  
12 [30]. Wang J, Wang PQ, Xiong XJ. Current situation and re-understanding of  
13 syndrome and formula syndrome in Chinese medicine. Int Med 2012; 2:e1000113.  
14 (Corresponding Author)

15  
16  
17 [31]. Wang J, Xiong XJ. Current situation and perspectives of clinical study in  
18 integrative medicine in China. Evid Based Complement Alternat Med 2012; 2012:  
19 e268542. (Corresponding Author)

20  
21  
22 [32]. Xv YL, Du WX, Overview and thinking about Chinese herb medicine treatment  
23 of coronary disease. Heart disease branch of China association of Chinese medicine  
24 annual meeting and Beijing Chinese medicine academic society of professional  
25 committee on cardiovascular disease. 2012:143-145. Chinese

26  
27  
28 [33]. Schulz KF, Altman DG, Moher D, et al. CONSORT 2010 statement: updated  
29 guidelines for reporting parallel group randomised trials. J Pharmacol Pharmacother  
30 2010;1:100

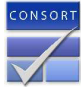

## CONSORT 2010 checklist of information to include when reporting a randomised trial\*

| Section/Topic                    | Item No | Checklist item                                                                                                                                                                              | Reported on page No |
|----------------------------------|---------|---------------------------------------------------------------------------------------------------------------------------------------------------------------------------------------------|---------------------|
| <b>Title and abstract</b>        |         |                                                                                                                                                                                             |                     |
|                                  | 1a      | Identification as a randomised trial in the title                                                                                                                                           | 1                   |
|                                  | 1b      | Structured summary of trial design, methods, results, and conclusions (for specific guidance see CONSORT for abstracts)                                                                     | 1-2                 |
| <b>Introduction</b>              |         |                                                                                                                                                                                             |                     |
| Background and objectives        | 2a      | Scientific background and explanation of rationale                                                                                                                                          | 2-5                 |
|                                  | 2b      | Specific objectives or hypotheses                                                                                                                                                           | 5                   |
| <b>Methods</b>                   |         |                                                                                                                                                                                             |                     |
| Trial design                     | 3a      | Description of trial design (such as parallel, factorial) including allocation ratio                                                                                                        | 6                   |
|                                  | 3b      | Important changes to methods after trial commencement (such as eligibility criteria), with reasons                                                                                          |                     |
| Participants                     | 4a      | Eligibility criteria for participants                                                                                                                                                       | 6-8                 |
|                                  | 4b      | Settings and locations where the data were collected                                                                                                                                        | 12                  |
| Interventions                    | 5       | The interventions for each group with sufficient details to allow replication, including how and when they were actually administered                                                       | 8-9                 |
| Outcomes                         | 6a      | Completely defined pre-specified primary and secondary outcome measures, including how and when they were assessed                                                                          | 10-11               |
|                                  | 6b      | Any changes to trial outcomes after the trial commenced, with reasons                                                                                                                       |                     |
| Sample size                      | 7a      | How sample size was determined                                                                                                                                                              | 11-12               |
|                                  | 7b      | When applicable, explanation of any interim analyses and stopping guidelines                                                                                                                |                     |
| <b>Randomisation:</b>            |         |                                                                                                                                                                                             |                     |
| Sequence generation              | 8a      | Method used to generate the random allocation sequence                                                                                                                                      | 9                   |
|                                  | 8b      | Type of randomisation; details of any restriction (such as blocking and block size)                                                                                                         | 9                   |
| Allocation concealment mechanism | 9       | Mechanism used to implement the random allocation sequence (such as sequentially numbered containers), describing any steps taken to conceal the sequence until interventions were assigned | 9                   |
| Implementation                   | 10      | Who generated the random allocation sequence, who enrolled participants, and who assigned participants to interventions                                                                     | 9                   |
| Blinding                         | 11a     | If done, who was blinded after assignment to interventions (for example, participants, care providers, those                                                                                | 9                   |

|    |                          |                                                                                                                     |       |
|----|--------------------------|---------------------------------------------------------------------------------------------------------------------|-------|
| 1  |                          |                                                                                                                     |       |
| 2  |                          | assessing outcomes) and how                                                                                         |       |
| 3  |                          |                                                                                                                     |       |
| 4  |                          | 11b If relevant, description of the similarity of interventions                                                     | 8     |
| 5  | Statistical methods      | 12a Statistical methods used to compare groups for primary and secondary outcomes                                   | 12    |
| 6  |                          | 12b Methods for additional analyses, such as subgroup analyses and adjusted analyses                                | 12    |
| 7  |                          |                                                                                                                     |       |
| 8  | <b>Results</b>           |                                                                                                                     |       |
| 9  | Participant flow (a      | 13a For each group, the numbers of participants who were randomly assigned, received intended treatment, and        | 10    |
| 10 | diagram is strongly      | were analysed for the primary outcome                                                                               |       |
| 11 | recommended)             | 13b For each group, losses and exclusions after randomisation, together with reasons                                | 7-8   |
| 12 | Recruitment              | 14a Dates defining the periods of recruitment and follow-up                                                         | 2     |
| 13 |                          | 14b Why the trial ended or was stopped                                                                              | 8     |
| 14 | Baseline data            | 15 A table showing baseline demographic and clinical characteristics for each group                                 |       |
| 15 | Numbers analysed         | 16 For each group, number of participants (denominator) included in each analysis and whether the analysis was      |       |
| 16 |                          | by original assigned groups                                                                                         |       |
| 17 |                          |                                                                                                                     |       |
| 18 | Outcomes and             | 17a For each primary and secondary outcome, results for each group, and the estimated effect size and its           | 10    |
| 19 | estimation               | precision (such as 95% confidence interval)                                                                         |       |
| 20 |                          | 17b For binary outcomes, presentation of both absolute and relative effect sizes is recommended                     |       |
| 21 | Ancillary analyses       | 18 Results of any other analyses performed, including subgroup analyses and adjusted analyses, distinguishing       |       |
| 22 |                          | pre-specified from exploratory                                                                                      |       |
| 23 |                          |                                                                                                                     |       |
| 24 | Harms                    | 19 All important harms or unintended effects in each group (for specific guidance see CONSORT for harms)            | 11    |
| 25 |                          |                                                                                                                     |       |
| 26 | <b>Discussion</b>        |                                                                                                                     |       |
| 27 | Limitations              | 20 Trial limitations, addressing sources of potential bias, imprecision, and, if relevant, multiplicity of analyses | 15    |
| 28 | Generalisability         | 21 Generalisability (external validity, applicability) of the trial findings                                        | 15    |
| 29 | Interpretation           | 22 Interpretation consistent with results, balancing benefits and harms, and considering other relevant evidence    | 12-15 |
| 30 |                          |                                                                                                                     |       |
| 31 | <b>Other information</b> |                                                                                                                     |       |
| 32 | Registration             | 23 Registration number and name of trial registry                                                                   | 2     |
| 33 | Protocol                 | 24 Where the full trial protocol can be accessed, if available                                                      |       |
| 34 | Funding                  | 25 Sources of funding and other support (such as supply of drugs), role of funders                                  | 8     |
| 35 |                          |                                                                                                                     |       |

37 \*We strongly recommend reading this statement in conjunction with the CONSORT 2010 Explanation and Elaboration for important clarifications on all the items. If relevant, we also  
 38 recommend reading CONSORT extensions for cluster randomised trials, non-inferiority and equivalence trials, non-pharmacological treatments, herbal interventions, and pragmatic trials.  
 39 Additional extensions are forthcoming: for those and for up to date references relevant to this checklist, see [www.consort-statement.org](http://www.consort-statement.org).

# BMJ Open

## Efficacy and safety of the Shexiang Baoxin pill for the treatment of coronary artery disease not amenable to revascularization: Study protocol for a randomised, placebo-controlled, double-blinded trial

|                                 |                                                                                                                                                                                                                                    |
|---------------------------------|------------------------------------------------------------------------------------------------------------------------------------------------------------------------------------------------------------------------------------|
| Journal:                        | <i>BMJ Open</i>                                                                                                                                                                                                                    |
| Manuscript ID                   | bmjopen-2017-018052.R1                                                                                                                                                                                                             |
| Article Type:                   | Protocol                                                                                                                                                                                                                           |
| Date Submitted by the Author:   | 19-Sep-2017                                                                                                                                                                                                                        |
| Complete List of Authors:       | Tian, Panpan; Beijing University of Traditional Chinese Medicine<br>Li, Jun; Guang'anmen Hospital<br>Gao, Jian; Beijing University of Traditional Chinese Medicine<br>Li, Ying; Beijing University of Traditional Chinese Medicine |
| <b>Primary Subject Heading</b>: | Complementary medicine                                                                                                                                                                                                             |
| Secondary Subject Heading:      | Cardiovascular medicine                                                                                                                                                                                                            |
| Keywords:                       | Coronary artery disease, Revascularization, Shexiang Baoxin pill, Randomised controlled trial                                                                                                                                      |
|                                 |                                                                                                                                                                                                                                    |

SCHOLARONE™  
Manuscripts



1  
2  
3 **Efficacy and safety of the Shexiang Baoxin pill for the treatment of**  
4 **coronary artery disease not amenable to revascularization: Study**  
5 **protocol for a randomised, placebo-controlled, double-blinded trial**  
6  
7

8 **Authors** Pan-pan Tian<sup>1</sup>, Jun Li<sup>2</sup>, Jian Gao<sup>1</sup>, Ying Li<sup>1</sup>  
9

10 **Keywords** Coronary artery disease; revascularization; Shexiang Baoxin  
11 pill; randomised controlled trial.  
12  
13

14 **Word count** About 3269 words.  
15

16 **ABSTRACT**  
17

18 **Introduction:** Coronary artery disease (CAD) not amenable to  
19 revascularization indicates that the coronary arteries have severe diffuse  
20 lesions, or calcification or that the CAD is complicated with severe  
21 multiple-organ disease. Currently, the Western medicines available for the  
22 treatment of CAD not amenable to revascularization are limited.  
23 Shexiang Baoxin pill (SBP), type of Chinese patent medicine, has been  
24 widely used to treat CAD in China for many years. Previous studies have  
25 shown that long-term administration of the SBP (1-2 pills three times  
26 daily, for at least 6 months) for the treatment of CAD is effective and safe  
27 with a significant, long-term effect. This study aims to evaluate the  
28 efficacy and safety of the SBP in patients with CAD not amenable to  
29 revascularization.  
30  
31  
32  
33  
34  
35  
36  
37  
38  
39

40 **Methods and analysis:** This is a multicentre, randomised, double-  
41 blinded, placebo-controlled clinical trial. A total of 440 participants will  
42 be randomly allocated to two groups: the intervention group and the  
43 placebo group. Based on conventional treatment with Western medicine,  
44 the intervention group will be treated with the SBP, and the placebo group  
45 will be treated with SBP placebo. The primary outcomes include major  
46 adverse cardiovascular events (including angina, acute myocardial  
47 infarction, pulmonary embolism and aortic dissection). The secondary  
48 outcomes include C-reactive protein, B-type natriuretic peptide,  
49  
50  
51  
52  
53  
54  
55  
56  
57  
58

1  
2  
3 electrocardiogram, echocardiographic parameters (ejection fraction  
4 percentage and the E/A ratio) and hospital readmission rates due to CAD.  
5 The assessment will be performed at baseline (before randomisation) and  
6 at 24 weeks after randomisation.  
7  
8  
9

10 **Ethics and dissemination:** The protocol has been approved by the  
11 Research Ethics Committee of Guang'anmen Hospital, China Academy  
12 of Chinese Medical Sciences in Beijing, China (reference: 2016-129-KY-  
13 01). The results from this study will be published in a peer-reviewed  
14 journal and be used as a basis for a multisite trial.  
15  
16  
17  
18

19 **Trial registration number:** NCT03072121(Clinical Trials); Pre-results.  
20  
21  
22

## 23 **BACKGROUND**

24  
25 Coronary artery disease (CAD) is characterised by the narrowing or  
26 blockage of arteries and vessels that provide oxygen and blood to the  
27 heart. It is the leading cause of death among 235 causes of death in  
28 humans; CAD currently kills more than 7 million people annually  
29 worldwide and is predicted to remain the top cause of death for the next  
30 20 years.<sup>1</sup> CAD not amenable to revascularization mainly refers to severe  
31 diffuse left main coronary artery and three-vessel stenosis, calcification or  
32 lesions or CAD complicated with severe multiple-organ disease, such as  
33 severe heart failure, infection, blood diseases, cancer cachexia, lung  
34 dysfunction or renal insufficiency.<sup>2</sup> With the rapid increase in patients  
35 with diabetes and obesity, patients with CAD not amenable to  
36 revascularization are expected to increase exponentially.<sup>3</sup> Currently, the  
37 main treatment methods for CAD include lifestyle changes, medical  
38 treatment (cholesterol lowering medications, beta-blockers, nitroglycerin,  
39 calcium antagonists, etc), coronary interventions and surgery.<sup>4-6</sup> Among  
40 these treatments, coronary revascularization including percutaneous  
41 coronary intervention and coronary artery bypass surgery, is an advanced  
42  
43  
44  
45  
46  
47  
48  
49  
50  
51  
52  
53  
54  
55  
56  
57  
58  
59  
60

1  
2  
3 and effective therapeutic method for CAD, especially acute coronary  
4 syndrom. However, in a contemporary series of patients undergoing  
5 coronary angiography, 28.8% of patients had significant CAD and did not  
6 undergo complete revascularization, among which 12.8% was partially  
7 revascularized, 9.3% was managed medically, and 6.7% had "no-options";  
8 these patients exhibited higher mortality at 3 years compared with  
9 completely revascularized patients.<sup>7</sup> Even Medicare has no classification  
10 code for patients with CAD not amenable to revascularization, and the  
11 United States Task Force addressing this situation stresses the urgent  
12 need for studies.<sup>8</sup>

13  
14  
15  
16  
17  
18  
19  
20  
21  
22 Chinese herbal medicine (CHM), a popular type of complementary  
23 and alternative medicine, plays an important role in treating CAD in  
24 China. According to the theory of traditional Chinese medicine (TCM),  
25 all the related symptoms and signs in a certain disease phase are  
26 generalized as a syndrome ('*Zheng*' in Chinese medicine), which is the  
27 basic unit and key concept of TCM.<sup>9</sup> Patients with CAD can be divided  
28 into different syndromes. In the diagnosis of CAD, '*Qi* deficiency  
29 and blood stasis syndrome' is an important type diagnosed from the  
30 viewpoint of TCM and our previous clinical practice.<sup>10</sup> Therefore, the  
31 principle of 'tonifying *Qi* and activating blood' is applied in the treatment  
32 of CAD not amenable to revascularization. Shexiang Baoxin pill (SBP),  
33 is based on the Suhexiang pill documented in the Prescription of Peaceful  
34 Benevolent Dispensary (*Taiping Huimin Hejiju Fang*) from the *Song*  
35 Dynasty. It consists of seven herbal medicines, including musk (*Moschus*,  
36 *Shexiang*), ginseng root (*Radix Ginseng*, *Renshen*), cow-bezoar (*Calculus*  
37 *Bovis*, *Niu Huang*), Storax (*Styrax*, *Suhexiang*), cassia bark (*Cortex*  
38 *Cinnamomi*, *Rougui*), toad venom (*Venenum Bufonis*, *Chansu*) and  
39 borneol (*Borneolum Syntheticum*, *Bingpian*). It has been widely used for  
40 the treatment of CAD in China for many years. Modern studies have  
41  
42  
43  
44  
45  
46  
47  
48  
49  
50  
51  
52  
53  
54  
55  
56  
57  
58  
59  
60

1  
2  
3 indicated that the major pharmacological mechanisms of the SBP include  
4 improving endothelial cell function, inhibiting vascular inflammation  
5 through decreasing the level of C-reactive protein and plasma  
6 homocysteine, stabilizing atherosclerotic plaque, promoting therapeutic  
7 angiogenesis, inhibiting the abnormal proliferation of vascular smooth  
8 muscle cells, reversing myocardial fibrosis, dilating coronary arteries,  
9 improving myocardial ischaemia and reducing myocardial infarct size.<sup>11-</sup>  
10  
11

12  
13  
14  
15  
16 <sup>14</sup> Experimental studies have shown that SBP is quickly absorbed in the  
17 body, is quickly eliminated and has a short duration of action. Although  
18 toad venom (Venenum Bufonis, *Chansu*) is toxic when administered  
19 alone, its toxicity may be reduced by extending the peak time of toad  
20 steroid ingredients via other compatible ingredients in the SBP thus  
21 showing the scientific nature of compound compatibility.<sup>15</sup> In addition,  
22 clinical studies have found that long-term SBP administration could  
23 reduce the occurrence of angina pectoris events and several other clinical  
24 events and reduce the dosage of nitrates used in patients with stable  
25 angina pectoris.<sup>16-19</sup> In addition, the adverse reactions to the SBP are mild,  
26 and studies have not shown that the SBP is harmful to liver or kidney  
27 function.<sup>19 20</sup> However, whether the SBP is effective for the treatment of  
28 CAD not amenable to revascularization is still unknown. The aim of this  
29 multicentre, randomised, double-blind, placebo-controlled trial is to  
30 evaluate the efficacy and safety of the Shexiang Baoxin pill in patients  
31 with CAD not amenable to revascularization.  
32  
33  
34  
35  
36  
37  
38  
39  
40  
41  
42  
43  
44  
45  
46  
47

## 48 **METHODS/DESIGN**

### 49 **Trial organisation**

50  
51  
52 The funders will not participate in the study design, data collection,  
53 analyses and interpretation, and manuscript preparation. An independent  
54 data and safety monitoring board will monitor the conduct and safety of  
55  
56  
57  
58  
59  
60

1  
2  
3 the trial to ensure patient safety. Stopping guidelines and monitoring  
4 practices have been established.  
5

### 6 **Study population**

7  
8 A total of 440 patients will be recruited from 7 centres: *Wangjing*  
9 Hospital, China Academy of Chinese Medical Sciences; *Beijing Anzhen*  
10 Hospital; The Second Affiliated Hospital of *Henan* University of  
11 Traditional Chinese Medicine; *Guangdong* Provincial Hospital of  
12 Traditional Chinese Medicine; *Shandong* University of Traditional  
13 Chinese Medicine; and *Shaanxi* Hospital of Traditional Chinese Medicine.  
14 The trial began in June 2017 and will continue until February 2019.  
15  
16  
17  
18  
19  
20  
21

### 22 **Recruitment of participants**

23 Two strategies are being used to recruit patients with CAD not amenable  
24 to revascularization. First, we are displaying recruitment posters outside  
25 the clinics. The posters contain brief introductions about the population  
26 required, the medicine offered to eligible participants, and the contact  
27 information of the researcher. Second, we are recruiting participants in  
28 outpatient clinics from *Wangjing* Hospital, China Academy of Chinese  
29 Medical Sciences; *Beijing Anzhen* Hospital; The Second Affiliated  
30 Hospital of *Henan* University of Traditional Chinese Medicine;  
31 *Guangdong* Provincial Hospital of Traditional Chinese Medicine;  
32 *Shandong* University of Traditional Chinese Medicine; and *Shaanxi*  
33 Hospital of Traditional Chinese Medicine. The patients who meet the  
34 study criteria are requested to sign a written informed consent form. The  
35 consent form includes the nature, objectives and potential benefits and  
36 consequences of the study. Additionally, the consent details the required  
37 length of follow-up, supportive care, the name of the principal  
38 investigator (Jun Li) responsible for the protocol and the patient's right to  
39 accept or refuse treatment and to terminate participation and withdraw  
40 from the protocol.  
41  
42  
43  
44  
45  
46  
47  
48  
49  
50  
51  
52  
53  
54  
55  
56  
57  
58  
59  
60

### **Inclusion criteria**

Participants will be included if they met the following requirements: between 55 and 75 years old, diagnosed with severe CAD through coronary arteriography, which showed that the left main coronary artery and three vessels have severe diffuse stenosis, calcification or vascular ectasia, and have “*Qi* deficiency and blood stasis syndrome” according to TCM. For the Western medicine diagnostic criteria, we refer to “Guidelines for the Prevention and Management of Chronic Stable Angina in China”<sup>21</sup> (2007 edition), “Guidelines for the Diagnosis and Management of Non-ST-segment Elevation Myocardial Infarction Acute Coronary Syndromes”<sup>22</sup> (2012 edition), and “Guidelines for the Diagnosis and Management of Acute ST-segment Elevation Myocardial Infarction”<sup>23</sup> (2010 edition), which were published by Cardiology Branch of the Chinese Medical Association. In addition, for the TCM diagnostic criteria we refer to “Guideline of Clinical Research of New Drugs of Traditional Chinese Medicine·Chest Obstruction”<sup>24</sup> (2002 edition). Finally, both cardiologists and cardiac surgeons will decide whether the CAD patients are in accordance with the inclusion criteria.

### **Exclusion criteria**

The exclusion criteria are as follows: a) patients with severe valvular disease or congenital decompensated cardiomyopathy; b) patients with CAD complicated with severe multiple-organ disease, such as severe heart failure, severe lung, liver or renal dysfunction, peptic ulcer in the active stage or intracranial haemorrhage; c) patients who use high-dose steroids due to connective tissue disease; d) patients with serious infections; e) patients with malignant tumours; f) patients with haematopoietic diseases; g) female patients who are pregnant or lactating; h) patients who are eligible for revascularization.

### **Handling of withdrawal and data management**

Participants may withdraw from the study at any time for any reason. If any patients want to withdraw, clinicians should ask whether they would be willing to complete the assessments according to the study schedule and record the last day of medicine intake. Patients lost to follow-up and patients who withdraw from the study will be recorded and reported. The data collected in this trial comprises information recorded in case report forms. After every visit at each centre, the data will be entered using the double-entry method.

### Interventions

In addition to conventional Western medical treatment, including antiplatelet, lipid-lowering, antihypertensive or anti-diabetic therapy, eligible patients will be allocated to receive SBP or placebo two pills three times daily for 24 successive weeks. The SBP and placebo were produced and packed in a single batch (Production batch number: 160299) by Shanghai Hutchison Pharmaceuticals Limited in Shanghai, China. The test results of drug quality were consistent with the Chinese Medicine Standards of the State Food and Drug Administration (SFDA). The SBP is a compound prepared with Chinese herbs, and their main components are shown in Table 1. The placebo pills have an identical appearance and scent as the active treatment pills. Patients will take the pills orally three times daily for 24 successive weeks. Intake of any other Chinese herbal decoction or Chinese patent medicine for treating CAD is prohibited during the study.

**Table 1** Main components of traditional Chinese medicines

| Chinese name | Description                                                                              | Comments                                                                                                                                    |
|--------------|------------------------------------------------------------------------------------------|---------------------------------------------------------------------------------------------------------------------------------------------|
| She Xiang    | A substance with a penetrating odour that is obtained from a gland of the male musk deer | The original material is banned from use due to the endangered status of the musk deer; a synthetic compound (muscone) is used in its place |



|             |                                                                                      |                                                                                                                                                                                             |
|-------------|--------------------------------------------------------------------------------------|---------------------------------------------------------------------------------------------------------------------------------------------------------------------------------------------|
| Ren Shen    | Root of Chinese ginseng                                                              | An extract that specifically includes ginsenosides                                                                                                                                          |
| Niu Huang   | The gallstone of an ox (water buffalo)                                               | The original material is too rare and costly to use in patent medicines and is substituted by a mixture of substances that have a similar effect                                            |
| Su He Xiang | An aromatic extract of the Liquidambar tree (styrax; storax)                         | It has antiplatelet aggregation, anti-thrombosis, anti-myocardial ischaemia and other effects                                                                                               |
| Rou Gui     | Bark of the cinnamon                                                                 | Cinnamon aqueous solution is rich in antioxidants and can reduce the risk of heart disease and diabetes                                                                                     |
| Chan Su     | The venom of a toad ( <i>Bufo bufo</i> )                                             | This agent is known as a cardiotonic, but it can also exhibit cardiotoxicity depending on dosage; it exhibits neurotoxicity. The amount of Chan Su in the SBP pill is small (28 µg/22.5 mg) |
| Bing Pian   | Crystalline aromatic component of certain plants that predominantly contains borneol | Due to high cost, the patent medicine contains synthetic borneol; borneol is known as a cardiac stimulant                                                                                   |

### Randomisation and blinding

Randomisation was performed by an independent statistician. The randomisation sequence (blocked and stratified for centres) was generated using SAS 9.4 software. Each centre received consecutively coded drugs. All of the drugs provided by the pharmaceutical company are labelled according to the randomisation schedule. This trial is a double-blind trial. The first level is for the case number corresponding to groups (group A and group B), and the second level is for the group corresponding to the intervention (the intervention and placebo groups). The numbers are kept in opaque sealed envelopes. The two levels of blinding are sealed



1  
2  
3 separately and given to the lead clinical researcher. Emergency letters  
4 have been sent to each of the centres, are kept with the test drug and will  
5 be properly preserved until the end of the trial. Treatment assignments  
6 will not be revealed to the patients and investigators (including  
7 statisticians) until the entire study is completed. The time points are  
8 shown in Figure 1.  
9  
10  
11  
12  
13

### 14 **Primary outcomes**

15  
16 The primary outcomes include mortality and major adverse  
17 cardiovascular events (including angina, acute myocardial infarction,  
18 pulmonary embolism and aortic dissection).  
19  
20  
21

### 22 **Secondary outcomes**

23  
24 The secondary outcomes include C-reactive protein, B-type natriuretic  
25 peptide, electrocardiogram (abnormal ST-T changes), echocardiographic  
26 parameters (EF% and the E/A ratio) and hospital readmission rate due to  
27 CAD.  
28  
29  
30

### 31 **Safety outcomes**

32  
33 Safety outcomes include the following (a) the measurement of vital signs,  
34 including temperature, blood pressure, respiration and heart rate; (b)  
35 routine blood tests, routine urine tests and routine stool tests; (c) blood  
36 lipid tests and blood glucose tests; (d) liver function tests (ALT, AST,  $\gamma$ -  
37 GT, ALP and TBIL), and renal function tests (BUN and Cr); (e)  
38 electrocardiogram (mainly ST-T changes); and (f) records of adverse  
39 events at any time.  
40  
41  
42  
43  
44  
45

46 These biological indicators are monitored from the grouping of these  
47 patients until the end of follow-up.  
48  
49

### 50 **Adverse events**

51  
52 Any unexpected symptoms, vital signs or sicknesses, as long as they  
53 cause discomfort, will be recorded as an adverse event. The start date, end  
54 date, degree, relationship with the trial medicine and whether the patients  
55  
56  
57  
58  
59  
60

drop out of the study will be recorded. Severe adverse events are required to be reported to the lead researcher of the trial, ethics committees and sponsors within 24 hours, and the participants will be provided with every necessary treatment. If the adverse event persists, follow-up will continue until the adverse event disappears.

### Sample size

The incidence of major adverse cardiovascular events will be compared between both groups. The sample size was calculated using the concept of efficiency as presented by Xie.<sup>25</sup> The efficiency is 80% in the intervention group and 60% in the placebo group, as suggested by a previous study. The following formula was used for a two-group trial:

$$n = (U_{\alpha} + U_{\beta})^2 2P(1 - P)/(P_1 - P_0)$$

Based on  $\alpha=0.05$  and  $\beta=0.2$ , the required sample size per group is approximately 90 participants. Allowing for 15% attrition, we should recruit 208 participants, with 104 patients in each group. Data analysis will be conducted by statisticians who are independent from the research team. An intent-to-treat analysis (ITT) will be carried out for patients who have received treatment at least once. Missing data will be adjusted using the last observation carried forward method. Per-protocol analysis will be restricted to participants who strictly follow the protocol and complete the study. The database will be maintained using Excel software. The raw data will be independently typed into computers by two statisticians. Every analysis will be conducted using SPSS software (SPSS 26.0). We will calculate the frequency and percentage of variables with the Descriptive statistics program. Pearson's  $\chi^2$  test will be performed on categorical variables, and Student's *t* test will be performed on measurement variables. The log-rank test will be used to assess the difference in survival distributions between the two groups with respect

1  
2  
3 to some failure time outcome.

#### 4 **Ethics and Dissemination**

5  
6 The study was approved by the Research Ethics Committee of  
7 Guang'anmen Hospital of the China Academy of Chinese Medical  
8 Sciences in Beijing, China (reference: 2016-129-KY-01). Final trial  
9 results will be disseminated via publication and [clinicaltrials.gov](http://clinicaltrials.gov).  
10  
11 Authorship will be determined based on BMJ Open guidelines.  
12  
13  
14  
15

#### 16 **DISCUSSION**

17  
18 Antiplatelet therapy is the cornerstone treatment for CAD. It's very  
19 important in the prevention of acute or subacute thrombosis and severe  
20 cardiovascular events. Currently, aspirin and clopidogrel are the most  
21 commonly used antiplatelet drugs. Aspirin plays an important role in the  
22 acute phase as well as the primary and secondary prevention of CAD.  
23 Clopidogrel is safe and effective in reducing acute coronary syndrome  
24 and ischaemic events in percutaneous coronary intervention patients. In  
25 addition, dual therapy with aspirin and clopidogrel has emerged as the  
26 gold standard therapy for patients treated with drug-eluting stents.  
27 However, there is variability in patient responses to antiplatelet therapy.  
28 Studies have identified that among patients with CAD, 5%~45% is  
29 aspirin resistant, 4%~30% is clopidogrel resistant and 10% is resistant to  
30 both.<sup>26</sup> In addition, medication compliance among patients is another  
31 problem. Middle-aged and elderly patients are at high risk for CAD.  
32 Elderly patients with CAD are always comorbid with hypertension,  
33 diabetes, hyperlipidaemia, cerebral infarction, obstructive pulmonary  
34 disease, etc. Lifelong medication is necessary to control disease  
35 development among this patient population. However, more than 60% of  
36 elderly patients fail to adhere to their medication regimen due to an  
37 abundance of drugs but insufficient relief of symptoms.<sup>27</sup> Therefore, it's  
38  
39  
40  
41  
42  
43  
44  
45  
46  
47  
48  
49  
50  
51  
52  
53  
54  
55  
56  
57  
58  
59  
60

1  
2  
3 necessary to identify other safe and effective treatment methods that can  
4 alleviate symptoms and improve the quality of life for CAD patients.

5  
6 As an alternative and complementary medicine, Chinese herbal  
7 medicine is attracting attention.<sup>28 29</sup> Many traditional Chinese medicine  
8 studies have implied that either single traditional Chinese medicines or  
9 compound preparations can have multiple target effects in the prevention  
10 and treatment of cardiovascular disease.<sup>30 31</sup> The composition of Chinese  
11 herbal compounds is more complicated. They can intervene at each phase  
12 of disease occurrence and development. The multiple target effects reflect  
13 the advantages of traditional Chinese herb medicine.<sup>32 33</sup>

14  
15 Treatment with syndrome differentiation is one of the characteristics  
16 of the TCM system. *Qi* deficiency and blood stasis syndrome is the core  
17 pathogenesis of CAD.<sup>34 35</sup> The SBP has the effect of supplementing *Qi*  
18 and activating blood, which is consistent with the core pathogenesis.  
19 Numerous studies have identified the efficacy and safety of the SBP in  
20 treating CAD. However, among these studies, most are based on clinical  
21 experience, case reports, case series and expert opinions whereas large-  
22 sample, retrospective, randomized controlled studies are scarce.<sup>36</sup> Whether  
23 the SBP is effective for the treatment of CAD not amenable to  
24 revascularization still requires confirmation by evidence-based  
25 medical research through large-sample, multicentre, randomised  
26 controlled clinical trials. To ensure appropriate high-quality methodology  
27 and strict quality control, this protocol has been developed according to  
28 the the SPIRIT 2013,<sup>37</sup> and the new extension of the CONSORT  
29 statement.<sup>38</sup> This study has a randomized, double-blind, parallel,  
30 controlled, multiple-centre clinical study design. It may be significant for  
31 the improvement of patient prognosis and quality of life.

32  
33 There are also some limitations in this study that should be considered.  
34 Due to the restriction of research project funds and trial period, the  
35  
36  
37  
38  
39  
40  
41  
42  
43  
44  
45  
46  
47  
48  
49  
50  
51  
52  
53  
54  
55  
56  
57  
58  
59  
60

1  
2  
3 treatment duration will be short, and thus, additional RCTs with long-  
4 term follow-up are warranted to determine the efficacy and safety of the  
5 SBP.  
6  
7

### 8 **Author affiliations**

9  
10 <sup>1</sup>Beijing University of Chinese Medicine, Beijing, China;

11  
12 <sup>2</sup>Guang'anmen Hospital of China Academy of Chinese Medical Sciences,  
13 Beijing, China.  
14

15 Correspondence to Dr Jun Li; gamyylj@163.com.  
16

17  
18 **Contributors** Jun Li is the principal investigator of this study. Pan-pan  
19 Tian wrote the first draft of the manuscript. Jun Li was involved in  
20 programme design and modifying the articles. Ying Li and Jian Gao  
21 contributed to the statistical acquisition and analysis of data. All authors  
22 critically revised the protocol for important intellectual content and  
23 approved the final manuscript.  
24  
25

26  
27  
28  
29 **Protocol version** V1.1; Aug 20, 2017.  
30

31 **Patient consent** Obtained.  
32

33 **Competing interests** None declared.  
34

35 **Funding** Provided by the China Academy of Traditional Chinese Medical  
36 Sciences.  
37

38  
39 **Data sharing** No additional unpublished data are available.  
40

41 **Figure legends** Flow chart.  
42  
43

### 44 **RESCERENCE:**

- 45  
46 1. Zhao D, Why dentists need to learn the epidemiological status and prevention  
47 strategy of coronary heart disease in China. *Chin J Stomatol* 2016;51: 385-386.  
48 2. C. Mannheimer, P. Camici, M. R. Chester, *et al.* The problem of chronic refractory  
49 angina Report from the ESC Joint Study Group on the Treatment of Refractory  
50 Angina. *Eur Heart J* 2002 ;(23):355-370.  
51 3. Gupta S1, Pressman GS, Morris DL, *et al.* Distribution of left ventricular ejection  
52 fraction in angina patients with severe coronary artery disease not am-enable to  
53 revascularization. *Coron Artery Dis* 2010;21:278-280.  
54 4. Luo L. The research progress of treatment methods for coronary heart disease. *Pub*  
55 *Med Forum Mag* 2013;17:3363-66. Chinese.  
56  
57  
58  
59  
60

- 1
  - 2
  - 3
  - 4
  - 5
  - 6
  - 7
  - 8
  - 9
  - 10
  - 11
  - 12
  - 13
  - 14
  - 15
  - 16
  - 17
  - 18
  - 19
  - 20
  - 21
  - 22
  - 23
  - 24
  - 25
  - 26
  - 27
  - 28
  - 29
  - 30
  - 31
  - 32
  - 33
  - 34
  - 35
  - 36
  - 37
  - 38
  - 39
  - 40
  - 41
  - 42
  - 43
  - 44
  - 45
  - 46
  - 47
  - 48
  - 49
  - 50
  - 51
  - 52
  - 53
  - 54
  - 55
  - 56
  - 57
  - 58
  - 59
  - 60
5. Zhang Y, Tang HQ, Li J. Meta-analysis on curative effect and safety of Shexiang Baoxin Wan in treatment of coronary heart disease, *Chin J Evid Based Cardiovasc Med* 2012;4:13-17. Chinese.
  6. Sun HH, Optimal treatment of multi-vessel complex coronary artery disease:D Shandong University, 2014.
  7. Williams B, Menon M, Satran D, *et al.* Patients with coronary artery disease not amenable to traditional revascularization: prevalence and 3-year mortality. *Catheter Cardiovasc Interv* 2010;75:886-891. doi: 10.1002/ccd.22431.
  8. Lozano I, Capin E, de la Hera JM, *et al.* Diffuse Coronary Artery Disease Not Amenable to Revascularization: Long-term Prognosis. *Rev Esp Cardiol (Engl Ed)* 2015;68:631-633. doi: 10.1016/j.rec.2015.02.013.
  9. Jiang M, Zhang C, Zheng G, *et al.* Traditional Chinese medicine Zheng in the era of evidence-based medicine: a literature analysis. *Evid Based Complement Alternat Med* 2012;2012:409568.
  10. Bi YF, Mao JY, Wang XL, *et al.* Clinical epidemiology survey of the traditional Chinese medicine etiology syndrome differentiation of coronary artery disease: study protocol of a multicenter trial. *Chin J Integr Med* 2012;10:619-627.
  11. Li WY, Shen JP. Research on mechanism of Shexiang Baoxin Pill in the treatment of coronary heart disease. *J Emerg Trad Chin Med* 2011; 20:114-115. Chinese.
  12. Liu Q, Lv C, Zhang WD, *et al.* Research progress of Shexiang Baoxin Pill. *Chin Trad Herb Drugs* 2016;47:1409-1417.
  13. Zhang XZ, Hou YM, Ou ZH. Effect of Shexiang Baoxin pill on coronary vasodilation by analysis of coronary angiography. *Chin J Integr Med* 2014;34:1432-5.
  14. Chen ZI, Gu N. Mechanism research of Shexiang Baoxin pill on treating coronary artery disease. *Jilin J Trad Chin Med* 2011;31:262-263.
  15. Liu Q, Lv C, Zhang WD, *et al.* Advance in Modern Studies on Shexiang Baoxin Pill. *China Tradit Herb Drugs* 2016,47:1409-1417
  16. Zhu H, Luo XP, Wang LJ, *et al.* Evaluation on Clinical Effect of Long Term Shexiang Baoxin Pill Administration for Treatment of Coronary Heart Disease. *Chin J Integr Med* 2010;30:474-477. Chinese.
  17. Lv JW, Wang JL, Qi H. Curative effect observation of Shexiang Baoxin Pill on multi-vessel lesions in CAD without revascularization. *Chin J Integr Med* 2015;13:1015-1516. Chinese.
  18. Du YQ. Long-term Effect Analysis of Long Term Shexiang Baoxin Pill Administration for Treatment of Coronary Heart Disease. *Guid Chin Med* 2016;14:184-185.
  19. Zhu H, Luo XP, Wang LJ, *et al.* Observation on Adverse Reaction and Safety of Long Term Shexiang Baoxin Pill Administration in Patients with Coronary Heart Disease. *Chin Trad Pat Med* 2010;32:2027-2028.
  20. Zhang YW. Discussion on Adverse Reaction and Safety of Long Term Shexiang Baoxin Pill Administration in Patients with Coronary Heart Disease. *Chin J Integr Tradit West Med Cardiovasc Dis* 2016;4:163-164.
  21. Cardiology Branch of Chinese Medical Association, Editor Committee of Chinese Journal of Cardiology. Chinese guidelines for the prevention and management of chronic stable angina. *Chin J Cardio* 2007; 35:195-204. Chinese.
  22. Cardiology Branch of Chinese Medical Association, Editor Committee of Chinese Journal of Cardiology. Guidelines for the diagnosis and management of non-ST-segment elevation myocardial infarction Acute Coronary Syndromes.



- 1  
2  
3 *Chin J Cardio* 2012; 40:353-367. Chinese.
- 4 23. Cardiology Branch of Chinese Medical Association, Editor Committee of  
5 Chinese Journal of Cardiology. Guidelines for the diagnosis and management of  
6 acute ST-segment elevation myocardial infarction. *Chin J Cardio* 2010;38:675-  
7 690. Chinese.
- 8 24. Zheng XY. Guideline of Clinical Research of New Drugs of Traditional Chinese  
9 Medicine: Chest Obstruction. *Chin Med Sci & Tech Press* 2002; 68-73. Chinese.
- 10 25. Xie H. Heart of Musk Pill Combined Western Medicine Therapy of Coronary  
11 Heart Disease Unstable Angina Random Parallel Control Study. *Chin J Pract Int*  
12 *Med* 2014;28:105-106.
- 13 26. Gu LY, Sun ZX. Progress of studies on aspirin resistance and clopidogrel  
14 resistance. *Chin Hosp Pharm J*, 2016: 866-869. Chinese
- 15 27. Ma H J, Yen M, Chen C H. Determinants of the medication adherence behavior  
16 among elderly patients with coronary heart diseases. *I Nur Edu Pract* 2015;5:38-  
17 44.
- 18 28. Xiong XJ. Integrating traditional Chinese medicine into Western cardiovascular  
19 medicine: an evidence-based approach. *Nat Rev Cardiol* 2015; 12: e374.
- 20 29. Xiong XJ, Wang Z, Wang J. Innovative strategy in treating angina pectoris with  
21 Chinese patent medicines by promoting blood circulation and removing  
22 blood stasis: experience from combination therapy in Chinese medicine. *Curr*  
23 *Vasc Pharmacol* 2015;13: 540-553.
- 24 30. Xiong XJ, Borrelli F, Ferreira AS, et al. Herbal medicines for cardiovascular  
25 diseases. *Evid Based Complement Alternat Med* 2014;2014:e809741.
- 26 31. Qian WD, Xiong XJ, Fang ZY, et al. Protective effect of Tetramethylpyrazine on  
27 myocardial ischemia-reperfusion injury. *Evid Based Complement Alternat*  
28 *Med* 2014; 2014: e107501.
- 29 32. Zhang H, Zhu HY. New interpretation of the advantages of traditional Chinese  
30 medicine in the treatment of cardiovascular disease. *Chin Arch Tradit Chin Med*  
31 2001;(03)214-222. Chinese
- 32 33. Liu HX, Liu P. Clinical characteristic advantage of traditional Chinese medicine  
33 in prevention and treatment of cardiovascular disease. *Beijing J Tradit Chin Med*  
34 2007;(07):396-399. Chinese
- 35 34. Wang J, Wang PQ, Xiong XJ. Current situation and re-understanding of  
36 syndrome and formula syndrome in Chinese medicine. *Int Med* 2012;2:e1000113.
- 37 35. Wang J, Xiong XJ. Current situation and perspectives of clinical study in  
38 integrative medicine in China. *Evid Based Complement Alternat Med* 2012;2012:  
39 e268542.
- 40 36. Xv YL, Du WX. Overview and thinking about Chinese herb medicine treatment  
41 of coronary disease. Heart disease branch of China association of Chinese  
42 medicine annual meeting and Beijing Chinese medicine academic society of  
43 professional committee on cardiovascular disease. 2012:143-145. Chinese
- 44 37. Chan A, Tetzlaff JM, Altman DG, et al. SPIRIT 2013 Statement: Defining  
45 Standard Protocol Items for Clinical Trials. *Ann Intern Med* 2013;158:200–207.
- 46 38. Klaus Linde, Benno Brinkhaus. Randomized Trials of Chinese Herbal Medicine:  
47 A New Extension of the CONSORT Statement. *Ann Intern Med* 2017;167:133-  
48 134.
- 49  
50  
51  
52  
53  
54  
55  
56  
57  
58  
59  
60

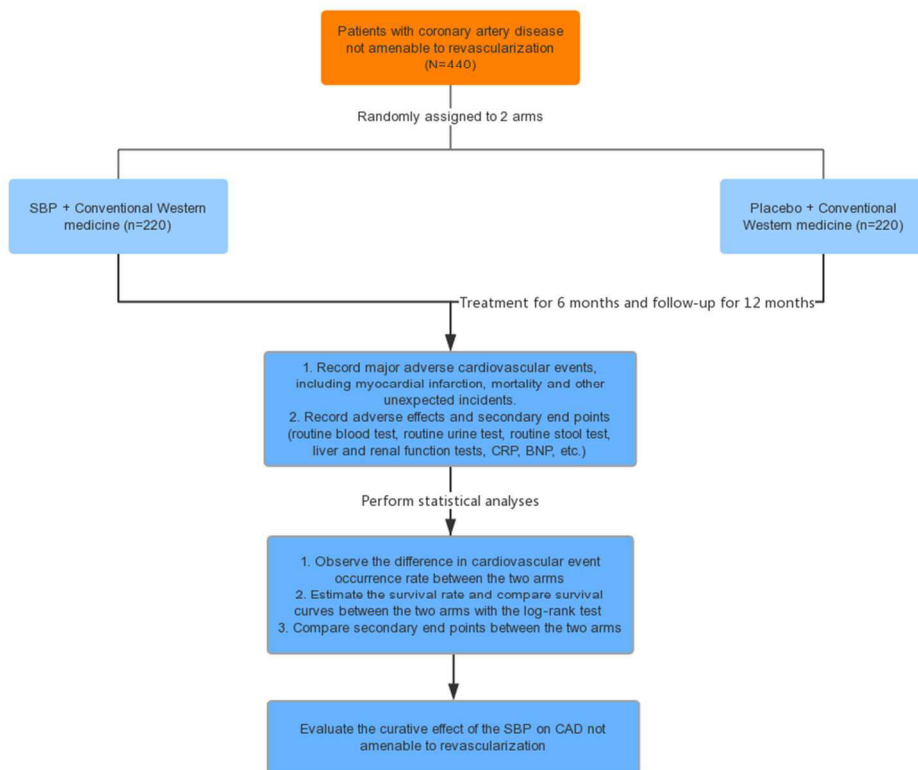

Flow chart



## Checklist of Items for Reporting Trials of Chinese Herbal Medicine Formulas\*

| Section/Topic                 | Item Number | Standard CONSORT Checklist Item                                                                                                   | Extension for CHM Formulas                                                                                                                                                        | Reported on Page Number |
|-------------------------------|-------------|-----------------------------------------------------------------------------------------------------------------------------------|-----------------------------------------------------------------------------------------------------------------------------------------------------------------------------------|-------------------------|
| Title, abstract, and keywords | 1a          | Identification as a randomized trial in the title                                                                                 | <i>Statement of whether the trial targets a TCM Pattern, a Western medicine-defined disease, or a Western medicine-defined disease with a specific TCM Pattern, if applicable</i> | 1                       |
|                               | 1b          | Structured summary of trial design, methods, results, and conclusions (for specific guidance, see CONSORT for abstracts [26, 27]) | <i>Illustration of the name and form of the formula used, and the TCM Pattern applied, if applicable</i>                                                                          | 1, 2                    |
|                               | 1c          |                                                                                                                                   | <i>Determination of appropriate keywords, including "Chinese herbal medicine formula" and "randomized controlled trial"</i>                                                       | 1                       |
| <b>Introduction</b>           |             |                                                                                                                                   |                                                                                                                                                                                   |                         |
| Background and objectives     | 2a          | Scientific background and explanation of rationale                                                                                | <i>Statement with biomedical science approaches and/or TCM approaches</i>                                                                                                         | 2-4                     |
|                               | 2b          | Specific objectives or hypotheses                                                                                                 | <i>Statement of whether the formula targets a Western medicine-defined disease, a TCM Pattern, or a Western medicine-defined disease with a specific TCM Pattern</i>              | 4                       |
| <b>Methods</b>                |             |                                                                                                                                   |                                                                                                                                                                                   |                         |
| Trial design                  | 3a          | Description of trial design (such as parallel, factorial), including allocation ratio                                             |                                                                                                                                                                                   | 4, 5                    |
|                               | 3b          | Important changes to methods after trial commencement (such as eligibility criteria), with reasons                                |                                                                                                                                                                                   |                         |
| Participants                  | 4a          | Eligibility criteria for participants                                                                                             | <i>Statement of whether participants with a specific TCM Pattern were recruited, in terms of 1) diagnostic criteria and 2) inclusion and</i>                                      | 6                       |

|               |    |                                                                                                                                       |                                                                                                                                                                                                                                                                                                                                                                                                                                                                                                                                                                                                                                                                                                                                                                                                                                                                                                                                                                                                                                                                                                                                                                                                                                                                                                                                                                                                                                                                                                                                                              |         |
|---------------|----|---------------------------------------------------------------------------------------------------------------------------------------|--------------------------------------------------------------------------------------------------------------------------------------------------------------------------------------------------------------------------------------------------------------------------------------------------------------------------------------------------------------------------------------------------------------------------------------------------------------------------------------------------------------------------------------------------------------------------------------------------------------------------------------------------------------------------------------------------------------------------------------------------------------------------------------------------------------------------------------------------------------------------------------------------------------------------------------------------------------------------------------------------------------------------------------------------------------------------------------------------------------------------------------------------------------------------------------------------------------------------------------------------------------------------------------------------------------------------------------------------------------------------------------------------------------------------------------------------------------------------------------------------------------------------------------------------------------|---------|
|               |    |                                                                                                                                       | <i>exclusion criteria. All criteria used should be universally recognized, or reference given to where detailed explanation can be found.</i>                                                                                                                                                                                                                                                                                                                                                                                                                                                                                                                                                                                                                                                                                                                                                                                                                                                                                                                                                                                                                                                                                                                                                                                                                                                                                                                                                                                                                |         |
|               | 4b | Settings and locations where the data were collected                                                                                  |                                                                                                                                                                                                                                                                                                                                                                                                                                                                                                                                                                                                                                                                                                                                                                                                                                                                                                                                                                                                                                                                                                                                                                                                                                                                                                                                                                                                                                                                                                                                                              | 5       |
| Interventions | 5  | The interventions for each group with sufficient details to allow replication, including how and when they were actually administered | <p><i>Description(s) for different types of formulas should include the following:</i></p> <p><b>5a. For fixed CHM formulas</b></p> <ol style="list-style-type: none"> <li><i>1. Name, source, and dosage form (e.g., decoctions, granules, powders)</i></li> <li><i>2. Name, source, processing method, and dosage of each medical substance. Names of substances should be presented in at least 2 languages: Chinese (Pinyin), Latin, or English. Names of the parts of the substances used should be specified.</i></li> <li><i>3. Authentication method of each ingredient and how, when, where, and by whom it was conducted; statement of whether any voucher specimen was retained, and if so, where they were kept and whether they are accessible</i></li> <li><i>4. Principles, rationale, and interpretation of forming the formula</i></li> <li><i>5. Reference(s) as to the efficacy of the formula, if any</i></li> <li><i>6. Pharmacologic study results of the formula, if any</i></li> <li><i>7. Production method of the formula, if any</i></li> <li><i>8. Quality control of each ingredient and of the product of the formula, if any. This would include any quantitative and/or qualitative testing method(s); when, where, how, and by whom these tests were conducted; whether the original data and samples were kept, and, if so, whether they are accessible.</i></li> <li><i>9. Safety assessment of the formula, including tests for heavy metals and toxic elements, pesticide residues, microbial limit, and</i></li> </ol> | 3、 7、 8 |

1  
2  
3  
4  
5  
6  
7  
8  
9  
10  
11  
12  
13  
14  
15  
16  
17  
18  
19  
20  
21  
22  
23  
24  
25  
26  
27  
28  
29  
30  
31  
32  
33  
34  
35  
36  
37  
38  
39  
40  
41  
42  
43  
44  
45  
46  
47

|  |  |  |                                                                                                                                                                                                                                                                                                                                                                                                                                                                                                                                                                                                                                                                                                                                                                                                                                                                                                                                                                                                                                                                                                                                                                                                                                                                                                                                                                                                                                                                                                                                                                                                                                                                            |  |
|--|--|--|----------------------------------------------------------------------------------------------------------------------------------------------------------------------------------------------------------------------------------------------------------------------------------------------------------------------------------------------------------------------------------------------------------------------------------------------------------------------------------------------------------------------------------------------------------------------------------------------------------------------------------------------------------------------------------------------------------------------------------------------------------------------------------------------------------------------------------------------------------------------------------------------------------------------------------------------------------------------------------------------------------------------------------------------------------------------------------------------------------------------------------------------------------------------------------------------------------------------------------------------------------------------------------------------------------------------------------------------------------------------------------------------------------------------------------------------------------------------------------------------------------------------------------------------------------------------------------------------------------------------------------------------------------------------------|--|
|  |  |  | <p><i>acute/chronic toxicity, if any. If yes, it should be stated when, where, how, and by whom these tests were conducted; if the original data and samples were kept; and, if so, whether they are accessible.</i></p> <p><i>10. Dosage of the formula, and how the dosage was determined</i></p> <p><i>11. Administration route (e.g., oral, external)</i></p> <p><b>5b. For individualized CHM formulas</b></p> <p><i>1. See recommendations 5a 1–11</i></p> <p><i>2. Additional information: how, when, and by whom the formula was modified</i></p> <p><b>5c. For patent proprietary CHM formulas</b></p> <p><i>1. Reference to publicly available materials, such as pharmacopeia, for the details about the composition, dosage, efficacy, safety, and quality control of the formula</i></p> <p><i>2. Illustration of the details of the formula, namely 1) the proprietary product name (i.e., brand name), 2) name of manufacturer, 3) lot number, 4) production date and expiry date, 5) name and percentage of added materials, and 6) whether any additional quality control measures were conducted</i></p> <p><i>3. Statement of whether the patent proprietary formula used in the trial is for a condition that is identical to the publicly available reference</i></p> <p><b>5d. Control groups</b></p> <p><i>Placebo control</i></p> <p><i>1. Name and amount of each ingredient</i></p> <p><i>2. Description of the similarity of placebo with the intervention (e.g., color, smell, taste, appearance, packaging)</i></p> <p><i>3. Quality control and safety assessment, if any</i></p> <p><i>4. Administration route, regimen, and dosage</i></p> |  |
|--|--|--|----------------------------------------------------------------------------------------------------------------------------------------------------------------------------------------------------------------------------------------------------------------------------------------------------------------------------------------------------------------------------------------------------------------------------------------------------------------------------------------------------------------------------------------------------------------------------------------------------------------------------------------------------------------------------------------------------------------------------------------------------------------------------------------------------------------------------------------------------------------------------------------------------------------------------------------------------------------------------------------------------------------------------------------------------------------------------------------------------------------------------------------------------------------------------------------------------------------------------------------------------------------------------------------------------------------------------------------------------------------------------------------------------------------------------------------------------------------------------------------------------------------------------------------------------------------------------------------------------------------------------------------------------------------------------|--|

|                                  |     |                                                                                                                                                                                             |                                                                                                                                                                                                                                                                                           |      |
|----------------------------------|-----|---------------------------------------------------------------------------------------------------------------------------------------------------------------------------------------------|-------------------------------------------------------------------------------------------------------------------------------------------------------------------------------------------------------------------------------------------------------------------------------------------|------|
|                                  |     |                                                                                                                                                                                             | <p><i>5. Production information: where, when, how, and by whom the placebo was produced</i></p> <p><i>Active control</i></p> <p><i>1. If a CHM formula was used, see recommendations 5a–5c</i></p> <p><i>2. If a chemical drug was used, see item 5 of the CONSORT Statement (24)</i></p> |      |
| Outcomes                         | 6a  | Completely defined, prespecified primary and secondary outcome measures, including how and when they were assessed                                                                          | <i>Illustration of outcome measures with Pattern in detail</i>                                                                                                                                                                                                                            | 9、 2 |
|                                  | 6b  | Any changes to trial outcomes after the trial commenced, with reasons                                                                                                                       |                                                                                                                                                                                                                                                                                           |      |
| Sample size                      | 7a  | How sample size was determined                                                                                                                                                              |                                                                                                                                                                                                                                                                                           | 10   |
|                                  | 7b  | When applicable, explanation of any interim analyses and stopping guidelines                                                                                                                |                                                                                                                                                                                                                                                                                           |      |
| Randomization                    |     |                                                                                                                                                                                             |                                                                                                                                                                                                                                                                                           |      |
| Sequence generation              | 8a  | Method used to generate the random allocation sequence                                                                                                                                      |                                                                                                                                                                                                                                                                                           | 8    |
|                                  | 8b  | Type of randomization; details of any restriction (such as blocking and block size)                                                                                                         |                                                                                                                                                                                                                                                                                           | 8、 9 |
| Allocation concealment mechanism | 9   | Mechanism used to implement the random allocation sequence (such as sequentially numbered containers), describing any steps taken to conceal the sequence until interventions were assigned |                                                                                                                                                                                                                                                                                           | 8、 9 |
| Implementation                   | 10  | Who generated the random allocation sequence, who enrolled participants, and who assigned participants to interventions                                                                     |                                                                                                                                                                                                                                                                                           |      |
| Blinding                         | 11a | If done, who was blinded after assignment to interventions (for example, participants, care providers, those assessing outcomes) and                                                        |                                                                                                                                                                                                                                                                                           | 8、 9 |

|                                                         |     |                                                                                                                                                   |  |    |
|---------------------------------------------------------|-----|---------------------------------------------------------------------------------------------------------------------------------------------------|--|----|
|                                                         |     | how                                                                                                                                               |  |    |
|                                                         | 11b | If relevant, description of the similarity of interventions                                                                                       |  |    |
| Statistical methods                                     | 12a | Statistical methods used to compare groups for primary and secondary outcomes                                                                     |  | 10 |
|                                                         | 12b | Methods for additional analyses, such as subgroup analyses and adjusted analyses                                                                  |  |    |
| <b>Results</b>                                          |     |                                                                                                                                                   |  |    |
| Participant flow<br>(a diagram is strongly recommended) | 13a | For each group, the numbers of participants who were randomly assigned, received intended treatment, and were analyzed for the primary outcome    |  | 9  |
|                                                         | 13b | For each group, losses and exclusions after randomization, together with reasons                                                                  |  |    |
| Recruitment                                             | 14a | Dates defining the periods of recruitment and follow-up                                                                                           |  | 5  |
|                                                         | 14b | Why the trial ended or was stopped                                                                                                                |  |    |
| Baseline data                                           | 15  | A table showing baseline demographic and clinical characteristics for each group                                                                  |  |    |
| Numbers analyzed                                        | 16  | For each group, number of participants (denominator) included in each analysis and whether the analysis was by original assigned groups           |  |    |
| Outcomes and estimation                                 | 17a | For each primary and secondary outcome, results for each group, and the estimated effect size and its precision (such as 95% confidence interval) |  | 9  |
|                                                         | 17b | For binary outcomes, presentation of both absolute and relative effect                                                                            |  |    |

|                          |    |                                                                                                                                          |                                                                                  |        |
|--------------------------|----|------------------------------------------------------------------------------------------------------------------------------------------|----------------------------------------------------------------------------------|--------|
|                          |    | sizes is recommended                                                                                                                     |                                                                                  |        |
| Ancillary analyses       | 18 | Results of any other analyses performed, including subgroup analyses and adjusted analyses, distinguishing prespecified from exploratory |                                                                                  |        |
| Harms                    | 19 | All important harms or unintended effects in each group (for specific guidance, see CONSORT for harms [28])                              | <i>(There is no extension for this item)</i>                                     | 10     |
| <b>Discussion</b>        |    |                                                                                                                                          |                                                                                  |        |
| Limitations              | 20 | Trial limitations; addressing sources of potential bias; imprecision; and, if relevant, multiplicity of analyses                         |                                                                                  | 12、 13 |
| Generalizability         | 21 | Generalizability (external validity, applicability) of the trial findings                                                                | <i>Discussion of how the formula works on different TCM Patterns or diseases</i> |        |
| Interpretation           | 22 | Interpretation consistent with results, balancing benefits and harms, and considering other relevant evidence                            | <i>Interpretation with TCM theory</i>                                            | 11、 12 |
| <b>Other information</b> |    |                                                                                                                                          |                                                                                  |        |
| Registration             | 23 | Registration number and name of trial registry                                                                                           |                                                                                  | 2      |
| Protocol                 | 24 | Where the full trial protocol can be accessed, if available                                                                              |                                                                                  |        |
| Funding                  | 25 | Sources of funding and other support (such as supply of drugs), role of funders                                                          |                                                                                  | 13     |

CHM = Chinese herbal medicine; CONSORT = Consolidated Standards of Reporting Trials; TCM = traditional Chinese medicine.

\* The original CONSORT items are provided; elaborations for CHM formulas are in italicized text. We strongly recommend reading this checklist in conjunction with the CONSORT 2010 Explanation and Elaboration (29) for important clarifications on all original items of CONSORT Statement.

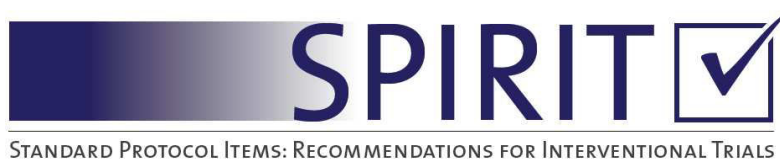

SPIRIT 2013 Checklist: Recommended items to address in a clinical trial protocol and related documents\*

| Section/item                      | Item No | Description                                                                                                                                                                                                                                                                              |
|-----------------------------------|---------|------------------------------------------------------------------------------------------------------------------------------------------------------------------------------------------------------------------------------------------------------------------------------------------|
| <b>Administrative information</b> |         |                                                                                                                                                                                                                                                                                          |
| Title                             | 1       | Descriptive title identifying the study design, population, interventions, and, if applicable, trial acronym <b>P1</b>                                                                                                                                                                   |
| Trial registration                | 2a      | Trial identifier and registry name. If not yet registered, name of intended registry <b>P2</b>                                                                                                                                                                                           |
|                                   | 2b      | All items from the World Health Organization Trial Registration Data Set <b>P2</b>                                                                                                                                                                                                       |
| Protocol version                  | 3       | Date and version identifier <b>P13</b>                                                                                                                                                                                                                                                   |
| Funding                           | 4       | Sources and types of financial, material, and other support <b>P13</b>                                                                                                                                                                                                                   |
| Roles and responsibilities        | 5a      | Names, affiliations, and roles of protocol contributors <b>P13</b>                                                                                                                                                                                                                       |
|                                   | 5b      | Name and contact information for the trial sponsor <b>P13</b>                                                                                                                                                                                                                            |
|                                   | 5c      | Role of study sponsor and funders, if any, in study design; collection, management, analysis, and interpretation of data; writing of the report; and the decision to submit the report for publication, including whether they will have ultimate authority over any of these activities |
|                                   | 5d      | Composition, roles, and responsibilities of the coordinating centre, steering committee, endpoint adjudication committee, data management team, and other individuals or groups overseeing the trial, if applicable (see Item 21a for data monitoring committee)                         |
| <b>Introduction</b>               |         |                                                                                                                                                                                                                                                                                          |
| Background and rationale          | 6a      | Description of research question and justification for undertaking the trial, including summary of relevant studies (published and unpublished) examining benefits and harms for each intervention <b>P2-P4</b>                                                                          |
|                                   | 6b      | Explanation for choice of comparators <b>P4</b>                                                                                                                                                                                                                                          |
| Objectives                        | 7       | Specific objectives or hypotheses <b>P2 P4</b>                                                                                                                                                                                                                                           |

1  
2  
3  
4  
5  
6  
7  
8  
9  
10  
11  
12  
13  
14  
15  
16  
17  
18  
19  
20  
21  
22  
23  
24  
25  
26  
27  
28  
29  
30  
31  
32  
33  
34  
35  
36  
37  
38  
39  
40  
41  
42  
43  
44  
45  
46  
47  
48  
49  
50  
51  
52  
53  
54  
55  
56  
57  
58  
59  
60

|              |   |                                                                                                                                                                                                                     |
|--------------|---|---------------------------------------------------------------------------------------------------------------------------------------------------------------------------------------------------------------------|
| Trial design | 8 | Description of trial design including type of trial (eg, parallel group, crossover, factorial, single group), allocation ratio, and framework (eg, superiority, equivalence, noninferiority, exploratory) <b>P4</b> |
|--------------|---|---------------------------------------------------------------------------------------------------------------------------------------------------------------------------------------------------------------------|

### **Methods: Participants, interventions, and outcomes**

|               |   |                                                                                                                                                                                              |
|---------------|---|----------------------------------------------------------------------------------------------------------------------------------------------------------------------------------------------|
| Study setting | 9 | Description of study settings (eg, community clinic, academic hospital) and list of countries where data will be collected. Reference to where list of study sites can be obtained <b>P5</b> |
|---------------|---|----------------------------------------------------------------------------------------------------------------------------------------------------------------------------------------------|

|                      |    |                                                                                                                                                                                                        |
|----------------------|----|--------------------------------------------------------------------------------------------------------------------------------------------------------------------------------------------------------|
| Eligibility criteria | 10 | Inclusion and exclusion criteria for participants. If applicable, eligibility criteria for study centres and individuals who will perform the interventions (eg, surgeons, psychotherapists) <b>P6</b> |
|----------------------|----|--------------------------------------------------------------------------------------------------------------------------------------------------------------------------------------------------------|

|               |     |                                                                                                                                      |
|---------------|-----|--------------------------------------------------------------------------------------------------------------------------------------|
| Interventions | 11a | Interventions for each group with sufficient detail to allow replication, including how and when they will be administered <b>P7</b> |
|---------------|-----|--------------------------------------------------------------------------------------------------------------------------------------|

|  |     |                                                                                                                                                                                                |
|--|-----|------------------------------------------------------------------------------------------------------------------------------------------------------------------------------------------------|
|  | 11b | Criteria for discontinuing or modifying allocated interventions for a given trial participant (eg, drug dose change in response to harms, participant request, or improving/worsening disease) |
|--|-----|------------------------------------------------------------------------------------------------------------------------------------------------------------------------------------------------|

|  |     |                                                                                                                                                   |
|--|-----|---------------------------------------------------------------------------------------------------------------------------------------------------|
|  | 11c | Strategies to improve adherence to intervention protocols, and any procedures for monitoring adherence (eg, drug tablet return, laboratory tests) |
|--|-----|---------------------------------------------------------------------------------------------------------------------------------------------------|

|  |     |                                                                                                         |
|--|-----|---------------------------------------------------------------------------------------------------------|
|  | 11d | Relevant concomitant care and interventions that are permitted or prohibited during the trial <b>P7</b> |
|--|-----|---------------------------------------------------------------------------------------------------------|

|          |    |                                                                                                                                                                                                                                                                                                                                                                                          |
|----------|----|------------------------------------------------------------------------------------------------------------------------------------------------------------------------------------------------------------------------------------------------------------------------------------------------------------------------------------------------------------------------------------------|
| Outcomes | 12 | Primary, secondary, and other outcomes, including the specific measurement variable (eg, systolic blood pressure), analysis metric (eg, change from baseline, final value, time to event), method of aggregation (eg, median, proportion), and time point for each outcome. Explanation of the clinical relevance of chosen efficacy and harm outcomes is strongly recommended <b>P9</b> |
|----------|----|------------------------------------------------------------------------------------------------------------------------------------------------------------------------------------------------------------------------------------------------------------------------------------------------------------------------------------------------------------------------------------------|

|                      |    |                                                                                                                                                                                            |
|----------------------|----|--------------------------------------------------------------------------------------------------------------------------------------------------------------------------------------------|
| Participant timeline | 13 | Time schedule of enrolment, interventions (including any run-ins and washouts), assessments, and visits for participants. A schematic diagram is highly recommended (see Figure) <b>P9</b> |
|----------------------|----|--------------------------------------------------------------------------------------------------------------------------------------------------------------------------------------------|

|             |    |                                                                                                                                                                                                  |
|-------------|----|--------------------------------------------------------------------------------------------------------------------------------------------------------------------------------------------------|
| Sample size | 14 | Estimated number of participants needed to achieve study objectives and how it was determined, including clinical and statistical assumptions supporting any sample size calculations <b>P10</b> |
|-------------|----|--------------------------------------------------------------------------------------------------------------------------------------------------------------------------------------------------|

|             |    |                                                                                               |
|-------------|----|-----------------------------------------------------------------------------------------------|
| Recruitment | 15 | Strategies for achieving adequate participant enrolment to reach target sample size <b>P5</b> |
|-------------|----|-----------------------------------------------------------------------------------------------|

### **Methods: Assignment of interventions (for controlled trials)**

Allocation:



|    |                |     |                                                                         |
|----|----------------|-----|-------------------------------------------------------------------------|
| 1  |                |     |                                                                         |
| 2  | Sequence       | 16a | Method of generating the allocation sequence (eg, computer-             |
| 3  | generation     |     | generated random numbers), and list of any factors for stratification.  |
| 4  |                |     | To reduce predictability of a random sequence, details of any planned   |
| 5  |                |     | restriction (eg, blocking) should be provided in a separate document    |
| 6  |                |     | that is unavailable to those who enrol participants or assign           |
| 7  |                |     | interventions <b>P8</b>                                                 |
| 8  |                |     |                                                                         |
| 9  | Allocation     | 16b | Mechanism of implementing the allocation sequence (eg, central          |
| 10 | concealment    |     | telephone; sequentially numbered, opaque, sealed envelopes),            |
| 11 | mechanism      |     | describing any steps to conceal the sequence until interventions are    |
| 12 |                |     | assigned <b>P8</b>                                                      |
| 13 |                |     |                                                                         |
| 14 | Implementation | 16c | Who will generate the allocation sequence, who will enrol participants, |
| 15 |                |     | and who will assign participants to interventions <b>P5 P8</b>          |
| 16 |                |     |                                                                         |
| 17 | Blinding       | 17a | Who will be blinded after assignment to interventions (eg, trial        |
| 18 | (masking)      |     | participants, care providers, outcome assessors, data analysts), and    |
| 19 |                |     | how <b>P8 P9</b>                                                        |
| 20 |                |     |                                                                         |
| 21 |                | 17b | If blinded, circumstances under which unblinding is permissible, and    |
| 22 |                |     | procedure for revealing a participant's allocated intervention during   |
| 23 |                |     | the trial                                                               |
| 24 |                |     |                                                                         |
| 25 |                |     |                                                                         |

### Methods: Data collection, management, and analysis

|    |                 |     |                                                                          |
|----|-----------------|-----|--------------------------------------------------------------------------|
| 26 |                 |     |                                                                          |
| 27 |                 |     |                                                                          |
| 28 | Data collection | 18a | Plans for assessment and collection of outcome, baseline, and other      |
| 29 | methods         |     | trial data, including any related processes to promote data quality (eg, |
| 30 |                 |     | duplicate measurements, training of assessors) and a description of      |
| 31 |                 |     | study instruments (eg, questionnaires, laboratory tests) along with      |
| 32 |                 |     | their reliability and validity, if known. Reference to where data        |
| 33 |                 |     | collection forms can be found, if not in the protocol <b>P2</b>          |
| 34 |                 |     |                                                                          |
| 35 |                 | 18b | Plans to promote participant retention and complete follow-up,           |
| 36 |                 |     | including list of any outcome data to be collected for participants who  |
| 37 |                 |     | discontinue or deviate from intervention protocols <b>P6 P7</b>          |
| 38 |                 |     |                                                                          |
| 39 | Data            | 19  | Plans for data entry, coding, security, and storage, including any       |
| 40 | management      |     | related processes to promote data quality (eg, double data entry;        |
| 41 |                 |     | range checks for data values). Reference to where details of data        |
| 42 |                 |     | management procedures can be found, if not in the protocol <b>P10</b>    |
| 43 |                 |     |                                                                          |
| 44 |                 |     |                                                                          |
| 45 | Statistical     | 20a | Statistical methods for analysing primary and secondary outcomes.        |
| 46 | methods         |     | Reference to where other details of the statistical analysis plan can be |
| 47 |                 |     | found, if not in the protocol <b>P10</b>                                 |
| 48 |                 |     |                                                                          |
| 49 |                 | 20b | Methods for any additional analyses (eg, subgroup and adjusted           |
| 50 |                 |     | analyses)                                                                |
| 51 |                 |     |                                                                          |
| 52 |                 | 20c | Definition of analysis population relating to protocol non-adherence     |
| 53 |                 |     | (eg, as randomised analysis), and any statistical methods to handle      |
| 54 |                 |     | missing data (eg, multiple imputation) <b>P10</b>                        |
| 55 |                 |     |                                                                          |
| 56 |                 |     |                                                                          |
| 57 |                 |     |                                                                          |
| 58 |                 |     |                                                                          |
| 59 |                 |     |                                                                          |
| 60 |                 |     |                                                                          |

**Methods: Monitoring**

- 1  
2  
3  
4  
5  
6  
7  
8  
9  
10  
11  
12  
13  
14  
15  
16  
17  
18  
19  
20  
21  
22
- |                 |     |                                                                                                                                                                                                                                                                                                                                                    |
|-----------------|-----|----------------------------------------------------------------------------------------------------------------------------------------------------------------------------------------------------------------------------------------------------------------------------------------------------------------------------------------------------|
| Data monitoring | 21a | Composition of data monitoring committee (DMC); summary of its role and reporting structure; statement of whether it is independent from the sponsor and competing interests; and reference to where further details about its charter can be found, if not in the protocol. <b>P7</b><br>Alternatively, an explanation of why a DMC is not needed |
|                 | 21b | Description of any interim analyses and stopping guidelines, including who will have access to these interim results and make the final decision to terminate the trial <b>P5</b>                                                                                                                                                                  |
| Harms           | 22  | Plans for collecting, assessing, reporting, and managing solicited and spontaneously reported adverse events and other unintended effects of trial interventions or trial conduct <b>P9 P10</b>                                                                                                                                                    |
| Auditing        | 23  | Frequency and procedures for auditing trial conduct, if any, and whether the process will be independent from investigators and the sponsor                                                                                                                                                                                                        |

**Ethics and dissemination**

- 23  
24  
25  
26  
27  
28  
29  
30  
31  
32  
33  
34  
35  
36  
37  
38  
39  
40  
41  
42  
43  
44  
45  
46  
47  
48  
49  
50  
51  
52  
53  
54  
55  
56  
57  
58  
59  
60
- |                               |     |                                                                                                                                                                                                                                  |
|-------------------------------|-----|----------------------------------------------------------------------------------------------------------------------------------------------------------------------------------------------------------------------------------|
| Research ethics approval      | 24  | Plans for seeking research ethics committee/institutional review board (REC/IRB) approval <b>P2</b>                                                                                                                              |
| Protocol amendments           | 25  | Plans for communicating important protocol modifications (eg, changes to eligibility criteria, outcomes, analyses) to relevant parties (eg, investigators, REC/IRBs, trial participants, trial registries, journals, regulators) |
| Consent or assent             | 26a | Who will obtain informed consent or assent from potential trial participants or authorised surrogates, and how (see Item 32)                                                                                                     |
|                               | 26b | Additional consent provisions for collection and use of participant data and biological specimens in ancillary studies, if applicable <b>P11</b>                                                                                 |
| Confidentiality               | 27  | How personal information about potential and enrolled participants will be collected, shared, and maintained in order to protect confidentiality before, during, and after the trial                                             |
| Declaration of interests      | 28  | Financial and other competing interests for principal investigators for the overall trial and each study site <b>P13</b>                                                                                                         |
| Access to data                | 29  | Statement of who will have access to the final trial dataset, and disclosure of contractual agreements that limit such access for investigators <b>P10</b>                                                                       |
| Ancillary and post-trial care | 30  | Provisions, if any, for ancillary and post-trial care, and for compensation to those who suffer harm from trial participation <b>P9 P10</b>                                                                                      |

|   |                         |     |                                                                                                                                                                                                                                                                                         |
|---|-------------------------|-----|-----------------------------------------------------------------------------------------------------------------------------------------------------------------------------------------------------------------------------------------------------------------------------------------|
| 1 | Dissemination<br>policy | 31a | Plans for investigators and sponsor to communicate trial results to participants, healthcare professionals, the public, and other relevant groups (eg, via publication, reporting in results databases, or other data sharing arrangements), including any publication restrictions P11 |
| 2 |                         | 31b | Authorship eligibility guidelines and any intended use of professional writers                                                                                                                                                                                                          |
| 3 |                         | 31c | Plans, if any, for granting public access to the full protocol, participant-level dataset, and statistical code                                                                                                                                                                         |

## Appendices

|    |                            |    |                                                                                                                                                                                                |
|----|----------------------------|----|------------------------------------------------------------------------------------------------------------------------------------------------------------------------------------------------|
| 15 | Informed consent materials | 32 | Model consent form and other related documentation given to participants and authorised surrogates P5                                                                                          |
| 18 | Biological specimens       | 33 | Plans for collection, laboratory evaluation, and storage of biological specimens for genetic or molecular analysis in the current trial and for future use in ancillary studies, if applicable |

---

\*It is strongly recommended that this checklist be read in conjunction with the SPIRIT 2013 Explanation & Elaboration for important clarification on the items. Amendments to the protocol should be tracked and dated. The SPIRIT checklist is copyrighted by the SPIRIT Group under the Creative Commons "[Attribution-NonCommercial-NoDerivs 3.0 Unported](#)" license.

# BMJ Open

## Efficacy and safety of the Shexiang Baoxin pill for the treatment of coronary artery disease not amenable to revascularization: Study protocol for a randomised, placebo-controlled, double-blinded trial

|                                 |                                                                                                                                                                                                                                                                                                        |
|---------------------------------|--------------------------------------------------------------------------------------------------------------------------------------------------------------------------------------------------------------------------------------------------------------------------------------------------------|
| Journal:                        | <i>BMJ Open</i>                                                                                                                                                                                                                                                                                        |
| Manuscript ID                   | bmjopen-2017-018052.R2                                                                                                                                                                                                                                                                                 |
| Article Type:                   | Protocol                                                                                                                                                                                                                                                                                               |
| Date Submitted by the Author:   | 26-Nov-2017                                                                                                                                                                                                                                                                                            |
| Complete List of Authors:       | Tian, Panpan; Guang'anmen Hospital; Beijing University of Traditional Chinese Medicine<br>Li, Jun; Guang'anmen Hospital<br>Gao, Jian; Guang'anmen Hospital ; Beijing University of Traditional Chinese Medicine<br>Li, Ying; Guang'anmen Hospital ; Beijing University of Traditional Chinese Medicine |
| <b>Primary Subject Heading</b>: | Complementary medicine                                                                                                                                                                                                                                                                                 |
| Secondary Subject Heading:      | Cardiovascular medicine                                                                                                                                                                                                                                                                                |
| Keywords:                       | Coronary artery disease, Revascularization, Shexiang Baoxin pill, Randomised controlled trial                                                                                                                                                                                                          |
|                                 |                                                                                                                                                                                                                                                                                                        |

SCHOLARONE™  
Manuscripts

1  
2  
3 **Efficacy and safety of the Shexiang Baoxin pill for the treatment of**  
4 **coronary artery disease not amenable to revascularization: Study**  
5 **protocol for a randomised, placebo-controlled, double-blinded trial**  
6  
7

8 **Authors** Pan-pan Tian<sup>1,2</sup>, Jun Li<sup>1</sup>, Jian Gao<sup>1,2</sup>, Ying Li<sup>1,2</sup>  
9

10 **Keywords** Coronary artery disease; revascularization; Shexiang Baoxin  
11 pill; randomised controlled trial.  
12  
13

14 **Word count** About 3271 words.  
15

16 **ABSTRACT**  
17

18 **Introduction:** Coronary artery disease (CAD) not amenable to  
19 revascularization indicates that the coronary arteries have severe diffuse  
20 lesions, or calcification or that the CAD is complicated with severe  
21 multiple-organ disease. Currently, the Western medicines available for the  
22 treatment of CAD not amenable to revascularization are limited.  
23 Shexiang Baoxin pill (SBP), type of Chinese patent medicine, has been  
24 widely used to treat CAD in China for many years. Previous studies have  
25 shown that long-term administration of the SBP (1-2 pills three times  
26 daily, for at least 6 months) for the treatment of CAD is effective and safe  
27 with a significant, long-term effect. This study aims to evaluate the  
28 efficacy and safety of the SBP in patients with CAD not amenable to  
29 revascularization.  
30  
31  
32  
33  
34  
35  
36  
37  
38  
39  
40

41 **Methods and analysis:** This is a multicentre, randomised, double-  
42 blinded, placebo-controlled clinical trial. A total of 440 participants will  
43 be randomly allocated to two groups: the intervention group and the  
44 placebo group. Based on conventional treatment with Western medicine,  
45 the intervention group will be treated with the SBP, and the placebo group  
46 will be treated with SBP placebo. The primary outcomes include major  
47 adverse cardiovascular events (including angina, acute myocardial  
48 infarction, pulmonary embolism and aortic dissection). The secondary  
49 outcomes include C-reactive protein, B-type natriuretic peptide,  
50  
51  
52  
53  
54  
55  
56  
57  
58  
59  
60

1  
2  
3 electrocardiogram, echocardiographic parameters (ejection fraction  
4 percentage and the E/A ratio) and hospital readmission rates due to CAD.  
5 The assessment will be performed at baseline (before randomisation) and  
6 at 24 weeks after randomisation.  
7  
8  
9

10 **Ethics and dissemination:** The protocol has been approved by the  
11 Research Ethics Committee of Guang'anmen Hospital, China Academy  
12 of Chinese Medical Sciences in Beijing, China (reference: 2016-129-KY-  
13 01). The results from this study will be published in a peer-reviewed  
14 journal and be used as a basis for a multisite trial.  
15  
16  
17  
18

19 **Trial registration number:** NCT03072121(Clinical Trials); Pre-results.  
20  
21  
22

## 23 **BACKGROUND**

24  
25 Coronary artery disease (CAD) is characterised by the narrowing or  
26 blockage of arteries and vessels that provide oxygen and blood to the  
27 heart. It is the leading cause of death among 235 causes of death in  
28 humans; CAD currently kills more than 7 million people annually  
29 worldwide and is predicted to remain the top cause of death for the next  
30 20 years.<sup>1</sup> CAD not amenable to revascularization mainly refers to severe  
31 diffuse left main coronary artery and three-vessel stenosis, calcification or  
32 lesions or CAD complicated with severe multiple-organ disease, such as  
33 severe heart failure, infection, blood diseases, cancer cachexia, lung  
34 dysfunction or renal insufficiency.<sup>2</sup> With the rapid increase in patients  
35 with diabetes and obesity, patients with CAD not amenable to  
36 revascularization are expected to increase exponentially.<sup>3</sup> Currently, the  
37 main treatment methods for CAD include lifestyle changes, medical  
38 treatment (cholesterol lowering medications, beta-blockers, nitroglycerin,  
39 calcium antagonists, etc), coronary interventions and surgery.<sup>4-6</sup> Among  
40 these treatments, coronary revascularization including percutaneous  
41 coronary intervention and coronary artery bypass surgery, is an advanced  
42  
43  
44  
45  
46  
47  
48  
49  
50  
51  
52  
53  
54  
55  
56  
57  
58  
59  
60

1  
2  
3 and effective therapeutic method for CAD, especially acute coronary  
4 syndrom. However, in a contemporary series of patients undergoing  
5 coronary angiography, 28.8% of patients had significant CAD and did not  
6 undergo complete revascularization, among which 12.8% was partially  
7 revascularized, 9.3% was managed medically, and 6.7% had "no-options";  
8 these patients exhibited higher mortality at 3 years compared with  
9 completely revascularized patients.<sup>7</sup> Even Medicare has no classification  
10 code for patients with CAD not amenable to revascularization, and the  
11 United States Task Force addressing this situation stresses the urgent  
12 need for studies.<sup>8</sup>

13  
14  
15  
16  
17  
18  
19  
20  
21  
22 Chinese herbal medicine (CHM), a popular type of complementary  
23 and alternative medicine, plays an important role in treating CAD in  
24 China. According to the theory of traditional Chinese medicine (TCM),  
25 all the related symptoms and signs in a certain disease phase are  
26 generalized as a syndrome ('*Zheng*' in Chinese medicine), which is the  
27 basic unit and key concept of TCM.<sup>9</sup> Patients with CAD can be divided  
28 into different syndromes. In the diagnosis of CAD, '*Qi* deficiency  
29 and blood stasis syndrome' is an important type diagnosed from the  
30 viewpoint of TCM and our previous clinical practice.<sup>10</sup> Therefore, the  
31 principle of 'tonifying *Qi* and activating blood' is applied in the treatment  
32 of CAD not amenable to revascularization. Shexiang Baoxin pill (SBP),  
33 is based on the Suhexiang pill documented in the Prescription of Peaceful  
34 Benevolent Dispensary (*Taiping Huimin Hejiju Fang*) from the *Song*  
35 Dynasty. It consists of seven herbal medicines, including musk (*Moschus*,  
36 *Shexiang*), ginseng root (*Radix Ginseng*, *Renshen*), cow-bezoar (*Calculus*  
37 *Bovis*, *Niu Huang*), Storax (*Styrax*, *Suhexiang*), cassia bark (*Cortex*  
38 *Cinnamomi*, *Rougui*), toad venom (*Venenum Bufonis*, *Chansu*) and  
39 borneol (*Borneolum Syntheticum*, *Bingpian*). It has been widely used for  
40 the treatment of CAD in China for many years. Modern studies have  
41  
42  
43  
44  
45  
46  
47  
48  
49  
50  
51  
52  
53  
54  
55  
56  
57  
58  
59  
60

1  
2  
3 indicated that the major pharmacological mechanisms of the SBP include  
4 improving endothelial cell function, inhibiting vascular inflammation  
5 through decreasing the level of C-reactive protein and plasma  
6 homocysteine, stabilizing atherosclerotic plaque, promoting therapeutic  
7 angiogenesis, inhibiting the abnormal proliferation of vascular smooth  
8 muscle cells, reversing myocardial fibrosis, dilating coronary arteries,  
9 improving myocardial ischaemia and reducing myocardial infarct size.<sup>11-</sup>  
10  
11

12  
13  
14  
15  
16 <sup>14</sup> Experimental studies have shown that SBP is quickly absorbed in the  
17 body, is quickly eliminated and has a short duration of action. Although  
18 toad venom (Venenum Bufonis, *Chansu*) is toxic when administered  
19 alone, its toxicity may be reduced by extending the peak time of toad  
20 steroid ingredients via other compatible ingredients in the SBP thus  
21 showing the scientific nature of compound compatibility.<sup>15</sup> In addition,  
22 clinical studies have found that long-term SBP administration could  
23 reduce the occurrence of angina pectoris events and several other clinical  
24 events and reduce the dosage of nitrates used in patients with stable  
25 angina pectoris.<sup>16-19</sup> In addition, the adverse reactions to the SBP are mild,  
26 and studies have not shown that the SBP is harmful to liver or kidney  
27 function.<sup>19 20</sup> However, whether the SBP is effective for the treatment of  
28 CAD not amenable to revascularization is still unknown. The aim of this  
29 multicentre, randomised, double-blind, placebo-controlled trial is to  
30 evaluate the efficacy and safety of the Shexiang Baoxin pill in patients  
31 with CAD not amenable to revascularization.  
32  
33  
34  
35  
36  
37  
38  
39  
40  
41  
42  
43  
44  
45  
46  
47

## 48 **METHODS/DESIGN**

### 49 **Trial organisation**

50  
51  
52 The funders will not participate in the study design, data collection,  
53 analyses and interpretation, and manuscript preparation. An independent  
54 data and safety monitoring board will monitor the conduct and safety of  
55  
56  
57  
58  
59  
60



1  
2  
3 the trial to ensure patient safety. Stopping guidelines and monitoring  
4 practices have been established.  
5

### 6 **Study population**

7  
8 A total of 440 patients will be recruited from 7 centres: *Wangjing*  
9 Hospital, China Academy of Chinese Medical Sciences; *Beijing Anzhen*  
10 Hospital; The Second Affiliated Hospital of *Henan* University of  
11 Traditional Chinese Medicine; *Guangdong* Provincial Hospital of  
12 Traditional Chinese Medicine; *Shandong* University of Traditional  
13 Chinese Medicine; and *Shaanxi* Hospital of Traditional Chinese Medicine.  
14 The trial began in June 2017 and will continue until February 2019.  
15  
16  
17  
18  
19  
20  
21

### 22 **Recruitment of participants**

23 Two strategies are being used to recruit patients with CAD not amenable  
24 to revascularization. First, we are displaying recruitment posters outside  
25 the clinics. The posters contain brief introductions about the population  
26 required, the medicine offered to eligible participants, and the contact  
27 information of the researcher. Second, we are recruiting participants in  
28 outpatient clinics from *Wangjing* Hospital, China Academy of Chinese  
29 Medical Sciences; *Beijing Anzhen* Hospital; The Second Affiliated  
30 Hospital of *Henan* University of Traditional Chinese Medicine;  
31 *Guangdong* Provincial Hospital of Traditional Chinese Medicine;  
32 *Shandong* University of Traditional Chinese Medicine; and *Shaanxi*  
33 Hospital of Traditional Chinese Medicine. The patients who meet the  
34 study criteria are requested to sign a written informed consent form. The  
35 consent form includes the nature, objectives and potential benefits and  
36 consequences of the study. Additionally, the consent details the required  
37 length of follow-up, supportive care, the name of the principal  
38 investigator (Jun Li) responsible for the protocol and the patient's right to  
39 accept or refuse treatment and to terminate participation and withdraw  
40 from the protocol.  
41  
42  
43  
44  
45  
46  
47  
48  
49  
50  
51  
52  
53  
54  
55  
56  
57  
58  
59  
60

### **Inclusion criteria**

Participants will be included if they met the following requirements: between 55 and 75 years old, diagnosed with severe CAD through coronary arteriography, which showed that the left main coronary artery and three vessels have severe diffuse stenosis, calcification or vascular ectasia, and have “*Qi* deficiency and blood stasis syndrome” according to TCM. For the Western medicine diagnostic criteria, we refer to “Guidelines for the Prevention and Management of Chronic Stable Angina in China”<sup>21</sup> (2007 edition), “Guidelines for the Diagnosis and Management of Non-ST-segment Elevation Myocardial Infarction Acute Coronary Syndromes”<sup>22</sup> (2012 edition), and “Guidelines for the Diagnosis and Management of Acute ST-segment Elevation Myocardial Infarction”<sup>23</sup> (2010 edition), which were published by Cardiology Branch of the Chinese Medical Association. In addition, for the TCM diagnostic criteria we refer to “Guideline of Clinical Research of New Drugs of Traditional Chinese Medicine·Chest Obstruction”<sup>24</sup> (2002 edition). Finally, both cardiologists and cardiac surgeons will decide whether the CAD patients are in accordance with the inclusion criteria.

### **Exclusion criteria**

The exclusion criteria are as follows: a) patients with severe valvular disease or congenital decompensated cardiomyopathy; b) patients with CAD complicated with severe multiple-organ disease, such as severe heart failure, severe lung, liver or renal dysfunction, peptic ulcer in the active stage or intracranial haemorrhage; c) patients who use high-dose steroids due to connective tissue disease; d) patients with serious infections; e) patients with malignant tumours; f) patients with haematopoietic diseases; g) female patients who are pregnant or lactating; h) patients who are eligible for revascularization.

### **Handling of withdrawal and data management**

Participants may withdraw from the study at any time for any reason. If any patients want to withdraw, clinicians should ask whether they would be willing to complete the assessments according to the study schedule and record the last day of medicine intake. Patients lost to follow-up and patients who withdraw from the study will be recorded and reported. The data collected in this trial comprises information recorded in case report forms. After every visit at each centre, the data will be entered using the double-entry method.

### Interventions

In addition to conventional Western medical treatment, including antiplatelet, lipid-lowering, antihypertensive or anti-diabetic therapy, eligible patients will be allocated to receive SBP or placebo two pills three times daily for 24 successive weeks. The SBP and placebo were produced and packed in a single batch (Production batch number: 160299) by Shanghai Hutchison Pharmaceuticals Limited in Shanghai, China. The test results of drug quality were consistent with the Chinese Medicine Standards of the State Food and Drug Administration (SFDA). The SBP is a compound prepared with Chinese herbs, and their main components are shown in Table 1. The placebo pills have an identical appearance and scent as the active treatment pills. Patients will take the pills orally three times daily for 24 successive weeks. Intake of any other Chinese herbal decoction or Chinese patent medicine for treating CAD is prohibited during the study.

**Table 1** Main components of traditional Chinese medicines

| Chinese name | Description                                                                              | Comments                                                                                                                                    |
|--------------|------------------------------------------------------------------------------------------|---------------------------------------------------------------------------------------------------------------------------------------------|
| She Xiang    | A substance with a penetrating odour that is obtained from a gland of the male musk deer | The original material is banned from use due to the endangered status of the musk deer; a synthetic compound (muscone) is used in its place |

|             |                                                                                      |                                                                                                                                                                                             |
|-------------|--------------------------------------------------------------------------------------|---------------------------------------------------------------------------------------------------------------------------------------------------------------------------------------------|
| Ren Shen    | Root of Chinese ginseng                                                              | An extract that specifically includes ginsenosides                                                                                                                                          |
| Niu Huang   | The gallstone of an ox (water buffalo)                                               | The original material is too rare and costly to use in patent medicines and is substituted by a mixture of substances that have a similar effect                                            |
| Su He Xiang | An aromatic extract of the Liquidambar tree (styrax; storax)                         | It has antiplatelet aggregation, anti-thrombosis, anti-myocardial ischaemia and other effects                                                                                               |
| Rou Gui     | Bark of the cinnamon                                                                 | Cinnamon aqueous solution is rich in antioxidants and can reduce the risk of heart disease and diabetes                                                                                     |
| Chan Su     | The venom of a toad ( <i>Bufo bufo</i> )                                             | This agent is known as a cardiotonic, but it can also exhibit cardiotoxicity depending on dosage; it exhibits neurotoxicity. The amount of Chan Su in the SBP pill is small (28 µg/22.5 mg) |
| Bing Pian   | Crystalline aromatic component of certain plants that predominantly contains borneol | Due to high cost, the patent medicine contains synthetic borneol; borneol is known as a cardiac stimulant                                                                                   |

### Randomisation and blinding

Randomisation was performed by an independent statistician. The randomisation sequence (blocked and stratified for centres) was generated using SAS 9.4 software. Each centre received consecutively coded drugs. All of the drugs provided by the pharmaceutical company are labelled according to the randomisation schedule. This trial is a double-blind trial. The first level is for the case number corresponding to groups (group A and group B), and the second level is for the group corresponding to the intervention (the intervention and placebo groups). The numbers are kept in opaque sealed envelopes. The two levels of blinding are sealed

1  
2  
3 separately and given to the lead clinical researcher. Emergency letters  
4 have been sent to each of the centres, are kept with the test drug and will  
5 be properly preserved until the end of the trial. Treatment assignments  
6 will not be revealed to the patients and investigators (including  
7 statisticians) until the entire study is completed. The time points are  
8 shown in Figure 1.  
9

### 14 **Primary outcomes**

15  
16 The primary outcomes include mortality and major adverse  
17 cardiovascular events (including angina, acute myocardial infarction,  
18 pulmonary embolism and aortic dissection).  
19

### 22 **Secondary outcomes**

23  
24 The secondary outcomes include C-reactive protein, B-type natriuretic  
25 peptide, electrocardiogram (abnormal ST-T changes), echocardiographic  
26 parameters (EF% and the E/A ratio) and hospital readmission rate due to  
27 CAD.  
28  
29

### 31 **Safety outcomes**

32  
33 Safety outcomes include the following (a) the measurement of vital signs,  
34 including temperature, blood pressure, respiration and heart rate; (b)  
35 routine blood tests, routine urine tests and routine stool tests; (c) blood  
36 lipid tests and blood glucose tests; (d) liver function tests (ALT, AST,  $\gamma$ -  
37 GT, ALP and TBIL), and renal function tests (BUN and Cr); (e)  
38 electrocardiogram (mainly ST-T changes); and (f) records of adverse  
39 events at any time.  
40  
41  
42  
43  
44  
45

46 These biological indicators are monitored from the grouping of these  
47 patients until the end of follow-up.  
48

### 50 **Adverse events**

51  
52 Any unexpected symptoms, vital signs or sicknesses, as long as they  
53 cause discomfort, will be recorded as an adverse event. The start date, end  
54 date, degree, relationship with the trial medicine and whether the patients  
55  
56  
57

drop out of the study will be recorded. Severe adverse events are required to be reported to the lead researcher of the trial, ethics committees and sponsors within 24 hours, and the participants will be provided with every necessary treatment. If the adverse event persists, follow-up will continue until the adverse event disappears.

### Sample size

The incidence of major adverse cardiovascular events will be compared between both groups. The sample size was calculated using the concept of efficiency as presented by Xie.<sup>25</sup> The efficiency is 80% in the intervention group and 60% in the placebo group, as suggested by a previous study. The following formula was used for a two-group trial:

$$n = (U_{\alpha} + U_{\beta})^2 2P(1 - P)/(P_1 - P_0)$$

Based on  $\alpha=0.05$  and  $\beta=0.2$ , the required sample size per group is approximately 90 participants. Allowing for 15% attrition, we should recruit 208 participants, with 104 patients in each group. Data analysis will be conducted by statisticians who are independent from the research team. An intent-to-treat analysis (ITT) will be carried out for patients who have received treatment at least once. Missing data will be adjusted using the last observation carried forward method. Per-protocol analysis will be restricted to participants who strictly follow the protocol and complete the study. The database will be maintained using Excel software. The raw data will be independently typed into computers by two statisticians. Every analysis will be conducted using SPSS software (SPSS 26.0). We will calculate the frequency and percentage of variables with the Descriptive statistics program. Pearson's  $\chi^2$  test will be performed on categorical variables, and Student's ttest will be performed on measurement variables. The log-rank test will be used to assess the difference in survival distributions between the two groups with respect

1  
2  
3 to some failure time outcome.

#### 4 **Ethics and Dissemination**

5  
6 The study was approved by the Research Ethics Committee of  
7 Guang'anmen Hospital of the China Academy of Chinese Medical  
8 Sciences in Beijing, China (reference: 2016-129-KY-01). Final trial  
9 results will be disseminated via publication and [clinicaltrials.gov](http://clinicaltrials.gov).  
10  
11  
12  
13  
14 Authorship will be determined based on BMJ Open guidelines.  
15

#### 16 17 18 **DISCUSSION**

19  
20 Antiplatelet therapy is the cornerstone treatment for CAD. It's very  
21 important in the prevention of acute or subacute thrombosis and severe  
22 cardiovascular events. Currently, aspirin and clopidogrel are the most  
23 commonly used antiplatelet drugs. Aspirin plays an important role in the  
24 acute phase as well as the primary and secondary prevention of CAD.  
25 Clopidogrel is safe and effective in reducing acute coronary syndrome  
26 and ischaemic events in percutaneous coronary intervention patients. In  
27 addition, dual therapy with aspirin and clopidogrel has emerged as the  
28 gold standard therapy for patients treated with drug-eluting stents.  
29 However, there is variability in patient responses to antiplatelet therapy.  
30 Studies have identified that among patients with CAD, 5%~45% is  
31 aspirin resistant, 4%~30% is clopidogrel resistant and 10% is resistant to  
32 both.<sup>26</sup> In addition, medication compliance among patients is another  
33 problem. Middle-aged and elderly patients are at high risk for CAD.  
34 Elderly patients with CAD are always comorbid with hypertension,  
35 diabetes, hyperlipidaemia, cerebral infarction, obstructive pulmonary  
36 disease, etc. Lifelong medication is necessary to control disease  
37 development among this patient population. However, more than 60% of  
38 elderly patients fail to adhere to their medication regimen due to an  
39 abundance of drugs but insufficient relief of symptoms.<sup>27</sup> Therefore, it's  
40  
41  
42  
43  
44  
45  
46  
47  
48  
49  
50  
51  
52  
53  
54  
55  
56  
57  
58  
59  
60



1  
2  
3 necessary to identify other safe and effective treatment methods that can  
4 alleviate symptoms and improve the quality of life for CAD patients.

5  
6 As an alternative and complementary medicine, Chinese herbal  
7 medicine is attracting attention.<sup>28 29</sup> Many traditional Chinese medicine  
8 studies have implied that either single traditional Chinese medicines or  
9 compound preparations can have multiple target effects in the prevention  
10 and treatment of cardiovascular disease.<sup>30 31</sup> The composition of Chinese  
11 herbal compounds is more complicated. They can intervene at each phase  
12 of disease occurrence and development. The multiple target effects reflect  
13 the advantages of traditional Chinese herb medicine.<sup>32 33</sup>

14  
15 Treatment with syndrome differentiation is one of the characteristics  
16 of the TCM system. *Qi* deficiency and blood stasis syndrome is the core  
17 pathogenesis of CAD.<sup>34 35</sup> The SBP has the effect of supplementing *Qi*  
18 and activating blood, which is consistent with the core pathogenesis.  
19 Numerous studies have identified the efficacy and safety of the SBP in  
20 treating CAD. However, among these studies, most are based on clinical  
21 experience, case reports, case series and expert opinions whereas large-  
22 sample, retrospective, randomized controlled studies are scarce.<sup>36</sup> Whether  
23 the SBP is effective for the treatment of CAD not amenable to  
24 revascularization still requires confirmation by evidence-based  
25 medical research through large-sample, multicentre, randomised  
26 controlled clinical trials. To ensure appropriate high-quality methodology  
27 and strict quality control, this protocol has been developed according to  
28 the the SPIRIT 2013,<sup>37</sup> and the new extension of the CONSORT  
29 statement.<sup>38</sup> This study has a randomized, double-blind, parallel,  
30 controlled, multiple-centre clinical study design. It may be significant for  
31 the improvement of patient prognosis and quality of life.

32  
33 There are also some limitations in this study that should be considered.  
34 Due to the restriction of research project funds and trial period, the  
35  
36  
37  
38  
39  
40  
41  
42  
43  
44  
45  
46  
47  
48  
49  
50  
51  
52  
53  
54  
55  
56  
57  
58  
59  
60



1  
2  
3 treatment duration will be short, and thus, additional RCTs with long-  
4 term follow-up are warranted to determine the efficacy and safety of the  
5 SBP.  
6  
7

### 8 **Author affiliations**

9  
10 <sup>1</sup>Guang'anmen Hospital of China Academy of Chinese Medical Sciences,  
11 Beijing, China.  
12

13 <sup>2</sup>Beijing University of Chinese Medicine, Beijing, China;  
14

15 Correspondence to Dr Jun Li; gamyylj@163.com.  
16

17  
18 **Contributors** Jun Li is the principal investigator of this study. Pan-pan  
19 Tian wrote the first draft of the manuscript. Jun Li was involved in  
20 programme design and modifying the articles. Ying Li and Jian Gao  
21 contributed to the statistical acquisition and analysis of data. All authors  
22 critically revised the protocol for important intellectual content and  
23 approved the final manuscript.  
24  
25  
26  
27  
28

29 **Protocol version** V1.2; Aug 20, 2017.  
30

31 **Patient consent** Obtained.  
32

33 **Competing interests** None declared.  
34

35 **Funding** Provided by the Fundamental Research Funds for the Central  
36 public welfare research institutes.  
37

38 **Data sharing** No additional unpublished data are available.  
39

40 **Figure legends** Flow chart.  
41  
42  
43

### 44 **RESCERENCE:**

- 45  
46 1. Zhao D, Why dentists need to learn the epidemiological status and prevention  
47 strategy of coronary heart disease in China. *Chin J Stomatol* 2016;51: 385-386.  
48 2. C. Mannheimer, P. Camici, M. R. Chester, *et al.* The problem of chronic refractory  
49 angina Report from the ESC Joint Study Group on the Treatment of Refractory  
50 Angina. *Eur Heart J* 2002 ;(23):355-370.  
51 3. Gupta S1, Pressman GS, Morris DL, *et al.* Distribution of left ventricular ejection  
52 fraction in angina patients with severe coronary artery disease not am-able to  
53 revascularization. *Coron Artery Dis* 2010;21:278-280.  
54 4. Luo L. The research progress of treatment methods for coronary heart disease. *Pub*  
55 *Med Forum Mag* 2013;17:3363-66. Chinese.  
56  
57  
58  
59  
60

- 1
  - 2
  - 3
  - 4
  - 5
  - 6
  - 7
  - 8
  - 9
  - 10
  - 11
  - 12
  - 13
  - 14
  - 15
  - 16
  - 17
  - 18
  - 19
  - 20
  - 21
  - 22
  - 23
  - 24
  - 25
  - 26
  - 27
  - 28
  - 29
  - 30
  - 31
  - 32
  - 33
  - 34
  - 35
  - 36
  - 37
  - 38
  - 39
  - 40
  - 41
  - 42
  - 43
  - 44
  - 45
  - 46
  - 47
  - 48
  - 49
  - 50
  - 51
  - 52
  - 53
  - 54
  - 55
  - 56
  - 57
  - 58
  - 59
  - 60
5. Zhang Y, Tang HQ, Li J. Meta-analysis on curative effect and safety of Shexiang Baoxin Wan in treatment of coronary heart disease, *Chin J Evid Based Cardiovasc Med* 2012;4:13-17. Chinese.
  6. Sun HH, Optimal treatment of multi-vessel complex coronary artery disease:D Shandong University, 2014.
  7. Williams B, Menon M, Satran D, *et al.* Patients with coronary artery disease not amenable to traditional revascularization: prevalence and 3-year mortality. *Catheter Cardiovasc Interv* 2010;75:886-891. doi: 10.1002/ccd.22431.
  8. Lozano I, Capin E, de la Hera JM, *et al.* Diffuse Coronary Artery Disease Not Amenable to Revascularization: Long-term Prognosis. *Rev Esp Cardiol (Engl Ed)* 2015;68:631-633. doi: 10.1016/j.rec.2015.02.013.
  9. Jiang M, Zhang C, Zheng G, *et al.* Traditional Chinese medicine Zheng in the era of evidence-based medicine: a literature analysis. *Evid Based Complement Alternat Med* 2012;2012:409568.
  10. Bi YF, Mao JY, Wang XL, *et al.* Clinical epidemiology survey of the traditional Chinese medicine etiology syndrome differentiation of coronary artery disease: study protocol of a multicenter trial. *Chin J Integr Med* 2012;10:619-627.
  11. Li WY, Shen JP. Research on mechanism of Shexiang Baoxin Pill in the treatment of coronary heart disease. *J Emerg Trad Chin Med* 2011; 20:114-115. Chinese.
  12. Liu Q, Lv C, Zhang WD, *et al.* Research progress of Shexiang Baoxin Pill. *Chin Trad Herb Drugs* 2016;47:1409-1417.
  13. Zhang XZ, Hou YM, Ou ZH. Effect of Shexiang Baoxin pill on coronary vasodilation by analysis of coronary angiography. *Chin J Integr Med* 2014;34:1432-5.
  14. Chen ZI, Gu N. Mechanism research of Shexiang Baoxin pill on treating coronary artery disease. *Jilin J Trad Chin Med* 2011;31:262-263.
  15. Liu Q, Lv C, Zhang WD, *et al.* Advance in Modern Studies on Shexiang Baoxin Pill. *China Tradit Herb Drugs* 2016;47:1409-1417
  16. Zhu H, Luo XP, Wang LJ, *et al.* Evaluation on Clinical Effect of Long Term Shexiang Baoxin Pill Administration for Treatment of Coronary Heart Disease. *Chin J Integr Med* 2010;30:474-477. Chinese.
  17. Lv JW, Wang JL, Qi H. Curative effect observation of Shexiang Baoxin Pill on multi-vessel lesions in CAD without revascularization. *Chin J Integr Med* 2015;13:1015-1516. Chinese.
  18. Du YQ. Long-term Effect Analysis of Long Term Shexiang Baoxin Pill Administration for Treatment of Coronary Heart Disease. *Guid Chin Med* 2016;14:184-185.
  19. Zhu H, Luo XP, Wang LJ, *et al.* Observation on Adverse Reaction and Safety of Long Term Shexiang Baoxin Pill Administration in Patients with Coronary Heart Disease. *Chin Trad Pat Med* 2010;32:2027-2028.
  20. Zhang YW. Discussion on Adverse Reaction and Safety of Long Term Shexiang Baoxin Pill Administration in Patients with Coronary Heart Disease. *Chin J Integr Tradit West Med Cardiovasc Dis* 2016;4:163-164.
  21. Cardiology Branch of Chinese Medical Association, Editor Committee of Chinese Journal of Cardiology. Chinese guidelines for the prevention and management of chronic stable angina. *Chin J Cardio* 2007; 35:195-204. Chinese.
  22. Cardiology Branch of Chinese Medical Association, Editor Committee of Chinese Journal of Cardiology. Guidelines for the diagnosis and management of non-ST-segment elevation myocardial infarction Acute Coronary Syndromes.

- 1  
2  
3 *Chin J Cardio* 2012; 40:353-367. Chinese.
- 4 23. Cardiology Branch of Chinese Medical Association, Editor Committee of  
5 Chinese Journal of Cardiology. Guidelines for the diagnosis and management of  
6 acute ST-segment elevation myocardial infarction. *Chin J Cardio* 2010;38:675-  
7 690. Chinese.
- 8 24. Zheng XY. Guideline of Clinical Research of New Drugs of Traditional Chinese  
9 Medicine: Chest Obstruction. *Chin Med Sci & Tech Press* 2002; 68-73. Chinese.
- 10 25. Xie H. Heart of Musk Pill Combined Western Medicine Therapy of Coronary  
11 Heart Disease Unstable Angina Random Parallel Control Study. *Chin J Pract Int*  
12 *Med* 2014;28:105-106.
- 13 26. Gu LY, Sun ZX. Progress of studies on aspirin resistance and clopidogrel  
14 resistance. *Chin Hosp Pharm J*, 2016: 866-869. Chinese
- 15 27. Ma H J, Yen M, Chen C H. Determinants of the medication adherence behavior  
16 among elderly patients with coronary heart diseases. *I Nur Edu Pract* 2015;5:38-  
17 44.
- 18 28. Xiong XJ. Integrating traditional Chinese medicine into Western cardiovascular  
19 medicine: an evidence-based approach. *Nat Rev Cardiol* 2015; 12: e374.
- 20 29. Xiong XJ, Wang Z, Wang J. Innovative strategy in treating angina pectoris with  
21 Chinese patent medicines by promoting blood circulation and removing  
22 blood stasis: experience from combination therapy in Chinese medicine. *Curr*  
23 *Vasc Pharmacol* 2015;13: 540-553.
- 24 30. Xiong XJ, Borrelli F, Ferreira AS, *et al.* Herbal medicines for cardiovascular  
25 diseases. *Evid Based Complement Alternat Med* 2014;2014:e809741.
- 26 31. Qian WD, Xiong XJ, Fang ZY, *et al.* Protective effect of Tetramethylpyrazine on  
27 myocardial ischemia-reperfusion injury. *Evid Based Complement Alternat*  
28 *Med* 2014; 2014: e107501.
- 29 32. Zhang H, Zhu HY. New interpretation of the advantages of traditional Chinese  
30 medicine in the treatment of cardiovascular disease. *Chin Arch Tradit Chin Med*  
31 2001;(03)214-222. Chinese
- 32 33. Liu HX, Liu P. Clinical characteristic advantage of traditional Chinese medicine  
33 in prevention and treatment of cardiovascular disease. *Beijing J Tradit Chin Med*  
34 2007;(07):396-399. Chinese
- 35 34. Wang J, Wang PQ, Xiong XJ. Current situation and re-understanding of  
36 syndrome and formula syndrome in Chinese medicine. *Int Med* 2012;2:e1000113.
- 37 35. Wang J, Xiong XJ. Current situation and perspectives of clinical study in  
38 integrative medicine in China. *Evid Based Complement Alternat Med* 2012;2012:  
39 e268542.
- 40 36. Xv YL, Du WX. Overview and thinking about Chinese herb medicine treatment  
41 of coronary disease. Heart disease branch of China association of Chinese  
42 medicine annual meeting and Beijing Chinese medicine academic society of  
43 professional committee on cardiovascular disease. 2012:143-145. Chinese
- 44 37. Chan A, Tetzlaff JM, Altman DG, *et al.* SPIRIT 2013 Statement: Defining  
45 Standard Protocol Items for Clinical Trials. *Ann Intern Med* 2013;158:200–207.
- 46 38. Klaus Linde, Benno Brinkhaus. Randomized Trials of Chinese Herbal Medicine:  
47 A New Extension of the CONSORT Statement. *Ann Intern Med* 2017;167:133-  
48 134.
- 49  
50  
51  
52  
53  
54  
55  
56  
57  
58  
59  
60

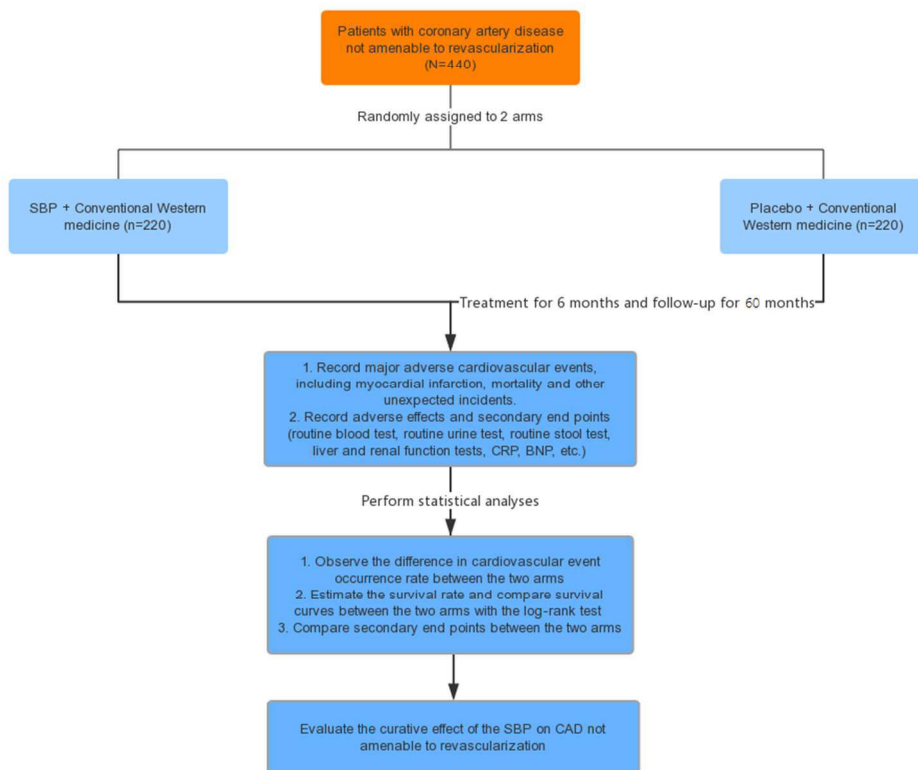

view only

## Checklist of Items for Reporting Trials of Chinese Herbal Medicine Formulas\*

| Section/Topic                 | Item Number | Standard CONSORT Checklist Item                                                                                                   | Extension for CHM Formulas                                                                                                                                                        | Reported on Page Number |
|-------------------------------|-------------|-----------------------------------------------------------------------------------------------------------------------------------|-----------------------------------------------------------------------------------------------------------------------------------------------------------------------------------|-------------------------|
| Title, abstract, and keywords | 1a          | Identification as a randomized trial in the title                                                                                 | <i>Statement of whether the trial targets a TCM Pattern, a Western medicine-defined disease, or a Western medicine-defined disease with a specific TCM Pattern, if applicable</i> | 1                       |
|                               | 1b          | Structured summary of trial design, methods, results, and conclusions (for specific guidance, see CONSORT for abstracts [26, 27]) | <i>Illustration of the name and form of the formula used, and the TCM Pattern applied, if applicable</i>                                                                          | 1, 2                    |
|                               | 1c          |                                                                                                                                   | <i>Determination of appropriate keywords, including "Chinese herbal medicine formula" and "randomized controlled trial"</i>                                                       | 1                       |
| <b>Introduction</b>           |             |                                                                                                                                   |                                                                                                                                                                                   |                         |
| Background and objectives     | 2a          | Scientific background and explanation of rationale                                                                                | <i>Statement with biomedical science approaches and/or TCM approaches</i>                                                                                                         | 2-4                     |
|                               | 2b          | Specific objectives or hypotheses                                                                                                 | <i>Statement of whether the formula targets a Western medicine-defined disease, a TCM Pattern, or a Western medicine-defined disease with a specific TCM Pattern</i>              | 4                       |
| <b>Methods</b>                |             |                                                                                                                                   |                                                                                                                                                                                   |                         |
| Trial design                  | 3a          | Description of trial design (such as parallel, factorial), including allocation ratio                                             |                                                                                                                                                                                   | 4, 5                    |
|                               | 3b          | Important changes to methods after trial commencement (such as eligibility criteria), with reasons                                |                                                                                                                                                                                   |                         |
| Participants                  | 4a          | Eligibility criteria for participants                                                                                             | <i>Statement of whether participants with a specific TCM Pattern were recruited, in terms of 1) diagnostic criteria and 2) inclusion and</i>                                      | 6                       |

|               |    |                                                                                                                                       |                                                                                                                                                                                                                                                                                                                                                                                                                                                                                                                                                                                                                                                                                                                                                                                                                                                                                                                                                                                                                                                                                                                                                                                                                                                                                                                                                                                                                                                                                                                                                              |         |
|---------------|----|---------------------------------------------------------------------------------------------------------------------------------------|--------------------------------------------------------------------------------------------------------------------------------------------------------------------------------------------------------------------------------------------------------------------------------------------------------------------------------------------------------------------------------------------------------------------------------------------------------------------------------------------------------------------------------------------------------------------------------------------------------------------------------------------------------------------------------------------------------------------------------------------------------------------------------------------------------------------------------------------------------------------------------------------------------------------------------------------------------------------------------------------------------------------------------------------------------------------------------------------------------------------------------------------------------------------------------------------------------------------------------------------------------------------------------------------------------------------------------------------------------------------------------------------------------------------------------------------------------------------------------------------------------------------------------------------------------------|---------|
|               |    |                                                                                                                                       | <i>exclusion criteria. All criteria used should be universally recognized, or reference given to where detailed explanation can be found.</i>                                                                                                                                                                                                                                                                                                                                                                                                                                                                                                                                                                                                                                                                                                                                                                                                                                                                                                                                                                                                                                                                                                                                                                                                                                                                                                                                                                                                                |         |
|               | 4b | Settings and locations where the data were collected                                                                                  |                                                                                                                                                                                                                                                                                                                                                                                                                                                                                                                                                                                                                                                                                                                                                                                                                                                                                                                                                                                                                                                                                                                                                                                                                                                                                                                                                                                                                                                                                                                                                              | 5       |
| Interventions | 5  | The interventions for each group with sufficient details to allow replication, including how and when they were actually administered | <p><i>Description(s) for different types of formulas should include the following:</i></p> <p><b>5a. For fixed CHM formulas</b></p> <ol style="list-style-type: none"> <li><i>1. Name, source, and dosage form (e.g., decoctions, granules, powders)</i></li> <li><i>2. Name, source, processing method, and dosage of each medical substance. Names of substances should be presented in at least 2 languages: Chinese (Pinyin), Latin, or English. Names of the parts of the substances used should be specified.</i></li> <li><i>3. Authentication method of each ingredient and how, when, where, and by whom it was conducted; statement of whether any voucher specimen was retained, and if so, where they were kept and whether they are accessible</i></li> <li><i>4. Principles, rationale, and interpretation of forming the formula</i></li> <li><i>5. Reference(s) as to the efficacy of the formula, if any</i></li> <li><i>6. Pharmacologic study results of the formula, if any</i></li> <li><i>7. Production method of the formula, if any</i></li> <li><i>8. Quality control of each ingredient and of the product of the formula, if any. This would include any quantitative and/or qualitative testing method(s); when, where, how, and by whom these tests were conducted; whether the original data and samples were kept, and, if so, whether they are accessible.</i></li> <li><i>9. Safety assessment of the formula, including tests for heavy metals and toxic elements, pesticide residues, microbial limit, and</i></li> </ol> | 3、 7、 8 |

1  
2  
3  
4  
5  
6  
7  
8  
9  
10  
11  
12  
13  
14  
15  
16  
17  
18  
19  
20  
21  
22  
23  
24  
25  
26  
27  
28  
29  
30  
31  
32  
33  
34  
35  
36  
37  
38  
39  
40  
41  
42  
43  
44  
45  
46  
47

|  |  |  |                                                                                                                                                                                                                                                                                                                                                                                                                                                                                                                                                                                                                                                                                                                                                                                                                                                                                                                                                                                                                                                                                                                                                                                                                                                                                                                                                                                                                                                                                                                                                                                                                                                                            |  |
|--|--|--|----------------------------------------------------------------------------------------------------------------------------------------------------------------------------------------------------------------------------------------------------------------------------------------------------------------------------------------------------------------------------------------------------------------------------------------------------------------------------------------------------------------------------------------------------------------------------------------------------------------------------------------------------------------------------------------------------------------------------------------------------------------------------------------------------------------------------------------------------------------------------------------------------------------------------------------------------------------------------------------------------------------------------------------------------------------------------------------------------------------------------------------------------------------------------------------------------------------------------------------------------------------------------------------------------------------------------------------------------------------------------------------------------------------------------------------------------------------------------------------------------------------------------------------------------------------------------------------------------------------------------------------------------------------------------|--|
|  |  |  | <p><i>acute/chronic toxicity, if any. If yes, it should be stated when, where, how, and by whom these tests were conducted; if the original data and samples were kept; and, if so, whether they are accessible.</i></p> <p><i>10. Dosage of the formula, and how the dosage was determined</i></p> <p><i>11. Administration route (e.g., oral, external)</i></p> <p><b>5b. For individualized CHM formulas</b></p> <p><i>1. See recommendations 5a 1–11</i></p> <p><i>2. Additional information: how, when, and by whom the formula was modified</i></p> <p><b>5c. For patent proprietary CHM formulas</b></p> <p><i>1. Reference to publicly available materials, such as pharmacopeia, for the details about the composition, dosage, efficacy, safety, and quality control of the formula</i></p> <p><i>2. Illustration of the details of the formula, namely 1) the proprietary product name (i.e., brand name), 2) name of manufacturer, 3) lot number, 4) production date and expiry date, 5) name and percentage of added materials, and 6) whether any additional quality control measures were conducted</i></p> <p><i>3. Statement of whether the patent proprietary formula used in the trial is for a condition that is identical to the publicly available reference</i></p> <p><b>5d. Control groups</b></p> <p><i>Placebo control</i></p> <p><i>1. Name and amount of each ingredient</i></p> <p><i>2. Description of the similarity of placebo with the intervention (e.g., color, smell, taste, appearance, packaging)</i></p> <p><i>3. Quality control and safety assessment, if any</i></p> <p><i>4. Administration route, regimen, and dosage</i></p> |  |
|--|--|--|----------------------------------------------------------------------------------------------------------------------------------------------------------------------------------------------------------------------------------------------------------------------------------------------------------------------------------------------------------------------------------------------------------------------------------------------------------------------------------------------------------------------------------------------------------------------------------------------------------------------------------------------------------------------------------------------------------------------------------------------------------------------------------------------------------------------------------------------------------------------------------------------------------------------------------------------------------------------------------------------------------------------------------------------------------------------------------------------------------------------------------------------------------------------------------------------------------------------------------------------------------------------------------------------------------------------------------------------------------------------------------------------------------------------------------------------------------------------------------------------------------------------------------------------------------------------------------------------------------------------------------------------------------------------------|--|

|                                  |     |                                                                                                                                                                                             |                                                                                                                                                                                                                                                                                           |      |
|----------------------------------|-----|---------------------------------------------------------------------------------------------------------------------------------------------------------------------------------------------|-------------------------------------------------------------------------------------------------------------------------------------------------------------------------------------------------------------------------------------------------------------------------------------------|------|
|                                  |     |                                                                                                                                                                                             | <p>5. <i>Production information: where, when, how, and by whom the placebo was produced</i></p> <p><i>Active control</i></p> <p>1. <i>If a CHM formula was used, see recommendations 5a–5c</i></p> <p>2. <i>If a chemical drug was used, see item 5 of the CONSORT Statement (24)</i></p> |      |
| Outcomes                         | 6a  | Completely defined, prespecified primary and secondary outcome measures, including how and when they were assessed                                                                          | <i>Illustration of outcome measures with Pattern in detail</i>                                                                                                                                                                                                                            | 9、 2 |
|                                  | 6b  | Any changes to trial outcomes after the trial commenced, with reasons                                                                                                                       |                                                                                                                                                                                                                                                                                           |      |
| Sample size                      | 7a  | How sample size was determined                                                                                                                                                              |                                                                                                                                                                                                                                                                                           | 10   |
|                                  | 7b  | When applicable, explanation of any interim analyses and stopping guidelines                                                                                                                |                                                                                                                                                                                                                                                                                           |      |
| Randomization                    |     |                                                                                                                                                                                             |                                                                                                                                                                                                                                                                                           |      |
| Sequence generation              | 8a  | Method used to generate the random allocation sequence                                                                                                                                      |                                                                                                                                                                                                                                                                                           | 8    |
|                                  | 8b  | Type of randomization; details of any restriction (such as blocking and block size)                                                                                                         |                                                                                                                                                                                                                                                                                           | 8、 9 |
| Allocation concealment mechanism | 9   | Mechanism used to implement the random allocation sequence (such as sequentially numbered containers), describing any steps taken to conceal the sequence until interventions were assigned |                                                                                                                                                                                                                                                                                           | 8、 9 |
| Implementation                   | 10  | Who generated the random allocation sequence, who enrolled participants, and who assigned participants to interventions                                                                     |                                                                                                                                                                                                                                                                                           |      |
| Blinding                         | 11a | If done, who was blinded after assignment to interventions (for example, participants, care providers, those assessing outcomes) and                                                        |                                                                                                                                                                                                                                                                                           | 8、 9 |



|                                                         |     |                                                                                                                                                   |  |    |
|---------------------------------------------------------|-----|---------------------------------------------------------------------------------------------------------------------------------------------------|--|----|
|                                                         |     | how                                                                                                                                               |  |    |
|                                                         | 11b | If relevant, description of the similarity of interventions                                                                                       |  |    |
| Statistical methods                                     | 12a | Statistical methods used to compare groups for primary and secondary outcomes                                                                     |  | 10 |
|                                                         | 12b | Methods for additional analyses, such as subgroup analyses and adjusted analyses                                                                  |  |    |
| <b>Results</b>                                          |     |                                                                                                                                                   |  |    |
| Participant flow<br>(a diagram is strongly recommended) | 13a | For each group, the numbers of participants who were randomly assigned, received intended treatment, and were analyzed for the primary outcome    |  | 9  |
|                                                         | 13b | For each group, losses and exclusions after randomization, together with reasons                                                                  |  |    |
| Recruitment                                             | 14a | Dates defining the periods of recruitment and follow-up                                                                                           |  | 5  |
|                                                         | 14b | Why the trial ended or was stopped                                                                                                                |  |    |
| Baseline data                                           | 15  | A table showing baseline demographic and clinical characteristics for each group                                                                  |  |    |
| Numbers analyzed                                        | 16  | For each group, number of participants (denominator) included in each analysis and whether the analysis was by original assigned groups           |  |    |
| Outcomes and estimation                                 | 17a | For each primary and secondary outcome, results for each group, and the estimated effect size and its precision (such as 95% confidence interval) |  | 9  |
|                                                         | 17b | For binary outcomes, presentation of both absolute and relative effect                                                                            |  |    |

|                          |    |                                                                                                                                          |                                                                                  |        |
|--------------------------|----|------------------------------------------------------------------------------------------------------------------------------------------|----------------------------------------------------------------------------------|--------|
|                          |    | sizes is recommended                                                                                                                     |                                                                                  |        |
| Ancillary analyses       | 18 | Results of any other analyses performed, including subgroup analyses and adjusted analyses, distinguishing prespecified from exploratory |                                                                                  |        |
| Harms                    | 19 | All important harms or unintended effects in each group (for specific guidance, see CONSORT for harms [28])                              | <i>(There is no extension for this item)</i>                                     | 10     |
| <b>Discussion</b>        |    |                                                                                                                                          |                                                                                  |        |
| Limitations              | 20 | Trial limitations; addressing sources of potential bias; imprecision; and, if relevant, multiplicity of analyses                         |                                                                                  | 12、 13 |
| Generalizability         | 21 | Generalizability (external validity, applicability) of the trial findings                                                                | <i>Discussion of how the formula works on different TCM Patterns or diseases</i> |        |
| Interpretation           | 22 | Interpretation consistent with results, balancing benefits and harms, and considering other relevant evidence                            | <i>Interpretation with TCM theory</i>                                            | 11、 12 |
| <b>Other information</b> |    |                                                                                                                                          |                                                                                  |        |
| Registration             | 23 | Registration number and name of trial registry                                                                                           |                                                                                  | 2      |
| Protocol                 | 24 | Where the full trial protocol can be accessed, if available                                                                              |                                                                                  |        |
| Funding                  | 25 | Sources of funding and other support (such as supply of drugs), role of funders                                                          |                                                                                  | 13     |

CHM = Chinese herbal medicine; CONSORT = Consolidated Standards of Reporting Trials; TCM = traditional Chinese medicine.

\* The original CONSORT items are provided; elaborations for CHM formulas are in italicized text. We strongly recommend reading this checklist in conjunction with the CONSORT 2010 Explanation and Elaboration (29) for important clarifications on all original items of CONSORT Statement.



SPIRIT 2013 Checklist: Recommended items to address in a clinical trial protocol and related documents\*

| Section/item                      | Item No | Description                                                                                                                                                                                                                                                                              |
|-----------------------------------|---------|------------------------------------------------------------------------------------------------------------------------------------------------------------------------------------------------------------------------------------------------------------------------------------------|
| <b>Administrative information</b> |         |                                                                                                                                                                                                                                                                                          |
| Title                             | 1       | Descriptive title identifying the study design, population, interventions, and, if applicable, trial acronym <b>P1</b>                                                                                                                                                                   |
| Trial registration                | 2a      | Trial identifier and registry name. If not yet registered, name of intended registry <b>P2</b>                                                                                                                                                                                           |
|                                   | 2b      | All items from the World Health Organization Trial Registration Data Set <b>P2</b>                                                                                                                                                                                                       |
| Protocol version                  | 3       | Date and version identifier <b>P13</b>                                                                                                                                                                                                                                                   |
| Funding                           | 4       | Sources and types of financial, material, and other support <b>P13</b>                                                                                                                                                                                                                   |
| Roles and responsibilities        | 5a      | Names, affiliations, and roles of protocol contributors <b>P13</b>                                                                                                                                                                                                                       |
|                                   | 5b      | Name and contact information for the trial sponsor <b>P13</b>                                                                                                                                                                                                                            |
|                                   | 5c      | Role of study sponsor and funders, if any, in study design; collection, management, analysis, and interpretation of data; writing of the report; and the decision to submit the report for publication, including whether they will have ultimate authority over any of these activities |
|                                   | 5d      | Composition, roles, and responsibilities of the coordinating centre, steering committee, endpoint adjudication committee, data management team, and other individuals or groups overseeing the trial, if applicable (see Item 21a for data monitoring committee)                         |
| <b>Introduction</b>               |         |                                                                                                                                                                                                                                                                                          |
| Background and rationale          | 6a      | Description of research question and justification for undertaking the trial, including summary of relevant studies (published and unpublished) examining benefits and harms for each intervention <b>P2-P4</b>                                                                          |
|                                   | 6b      | Explanation for choice of comparators <b>P4</b>                                                                                                                                                                                                                                          |
| Objectives                        | 7       | Specific objectives or hypotheses <b>P2 P4</b>                                                                                                                                                                                                                                           |

1  
2  
3  
4  
5  
6  
7  
8  
9  
10  
11  
12  
13  
14  
15  
16  
17  
18  
19  
20  
21  
22  
23  
24  
25  
26  
27  
28  
29  
30  
31  
32  
33  
34  
35  
36  
37  
38  
39  
40  
41  
42  
43  
44  
45  
46  
47  
48  
49  
50  
51  
52  
53  
54  
55  
56  
57  
58  
59  
60

|              |   |                                                                                                                                                                                                                     |
|--------------|---|---------------------------------------------------------------------------------------------------------------------------------------------------------------------------------------------------------------------|
| Trial design | 8 | Description of trial design including type of trial (eg, parallel group, crossover, factorial, single group), allocation ratio, and framework (eg, superiority, equivalence, noninferiority, exploratory) <b>P4</b> |
|--------------|---|---------------------------------------------------------------------------------------------------------------------------------------------------------------------------------------------------------------------|

### **Methods: Participants, interventions, and outcomes**

|               |   |                                                                                                                                                                                              |
|---------------|---|----------------------------------------------------------------------------------------------------------------------------------------------------------------------------------------------|
| Study setting | 9 | Description of study settings (eg, community clinic, academic hospital) and list of countries where data will be collected. Reference to where list of study sites can be obtained <b>P5</b> |
|---------------|---|----------------------------------------------------------------------------------------------------------------------------------------------------------------------------------------------|

|                      |    |                                                                                                                                                                                                        |
|----------------------|----|--------------------------------------------------------------------------------------------------------------------------------------------------------------------------------------------------------|
| Eligibility criteria | 10 | Inclusion and exclusion criteria for participants. If applicable, eligibility criteria for study centres and individuals who will perform the interventions (eg, surgeons, psychotherapists) <b>P6</b> |
|----------------------|----|--------------------------------------------------------------------------------------------------------------------------------------------------------------------------------------------------------|

|               |     |                                                                                                                                      |
|---------------|-----|--------------------------------------------------------------------------------------------------------------------------------------|
| Interventions | 11a | Interventions for each group with sufficient detail to allow replication, including how and when they will be administered <b>P7</b> |
|---------------|-----|--------------------------------------------------------------------------------------------------------------------------------------|

|  |     |                                                                                                                                                                                                |
|--|-----|------------------------------------------------------------------------------------------------------------------------------------------------------------------------------------------------|
|  | 11b | Criteria for discontinuing or modifying allocated interventions for a given trial participant (eg, drug dose change in response to harms, participant request, or improving/worsening disease) |
|--|-----|------------------------------------------------------------------------------------------------------------------------------------------------------------------------------------------------|

|  |     |                                                                                                                                                   |
|--|-----|---------------------------------------------------------------------------------------------------------------------------------------------------|
|  | 11c | Strategies to improve adherence to intervention protocols, and any procedures for monitoring adherence (eg, drug tablet return, laboratory tests) |
|--|-----|---------------------------------------------------------------------------------------------------------------------------------------------------|

|  |     |                                                                                                         |
|--|-----|---------------------------------------------------------------------------------------------------------|
|  | 11d | Relevant concomitant care and interventions that are permitted or prohibited during the trial <b>P7</b> |
|--|-----|---------------------------------------------------------------------------------------------------------|

|          |    |                                                                                                                                                                                                                                                                                                                                                                                          |
|----------|----|------------------------------------------------------------------------------------------------------------------------------------------------------------------------------------------------------------------------------------------------------------------------------------------------------------------------------------------------------------------------------------------|
| Outcomes | 12 | Primary, secondary, and other outcomes, including the specific measurement variable (eg, systolic blood pressure), analysis metric (eg, change from baseline, final value, time to event), method of aggregation (eg, median, proportion), and time point for each outcome. Explanation of the clinical relevance of chosen efficacy and harm outcomes is strongly recommended <b>P9</b> |
|----------|----|------------------------------------------------------------------------------------------------------------------------------------------------------------------------------------------------------------------------------------------------------------------------------------------------------------------------------------------------------------------------------------------|

|                      |    |                                                                                                                                                                                            |
|----------------------|----|--------------------------------------------------------------------------------------------------------------------------------------------------------------------------------------------|
| Participant timeline | 13 | Time schedule of enrolment, interventions (including any run-ins and washouts), assessments, and visits for participants. A schematic diagram is highly recommended (see Figure) <b>P9</b> |
|----------------------|----|--------------------------------------------------------------------------------------------------------------------------------------------------------------------------------------------|

|             |    |                                                                                                                                                                                                  |
|-------------|----|--------------------------------------------------------------------------------------------------------------------------------------------------------------------------------------------------|
| Sample size | 14 | Estimated number of participants needed to achieve study objectives and how it was determined, including clinical and statistical assumptions supporting any sample size calculations <b>P10</b> |
|-------------|----|--------------------------------------------------------------------------------------------------------------------------------------------------------------------------------------------------|

|             |    |                                                                                               |
|-------------|----|-----------------------------------------------------------------------------------------------|
| Recruitment | 15 | Strategies for achieving adequate participant enrolment to reach target sample size <b>P5</b> |
|-------------|----|-----------------------------------------------------------------------------------------------|

### **Methods: Assignment of interventions (for controlled trials)**

Allocation:

|    |                |     |                                                                         |
|----|----------------|-----|-------------------------------------------------------------------------|
| 1  |                |     |                                                                         |
| 2  | Sequence       | 16a | Method of generating the allocation sequence (eg, computer-             |
| 3  | generation     |     | generated random numbers), and list of any factors for stratification.  |
| 4  |                |     | To reduce predictability of a random sequence, details of any planned   |
| 5  |                |     | restriction (eg, blocking) should be provided in a separate document    |
| 6  |                |     | that is unavailable to those who enrol participants or assign           |
| 7  |                |     | interventions <b>P8</b>                                                 |
| 8  |                |     |                                                                         |
| 9  | Allocation     | 16b | Mechanism of implementing the allocation sequence (eg, central          |
| 10 | concealment    |     | telephone; sequentially numbered, opaque, sealed envelopes),            |
| 11 | mechanism      |     | describing any steps to conceal the sequence until interventions are    |
| 12 |                |     | assigned <b>P8</b>                                                      |
| 13 |                |     |                                                                         |
| 14 | Implementation | 16c | Who will generate the allocation sequence, who will enrol participants, |
| 15 |                |     | and who will assign participants to interventions <b>P5 P8</b>          |
| 16 |                |     |                                                                         |
| 17 | Blinding       | 17a | Who will be blinded after assignment to interventions (eg, trial        |
| 18 | (masking)      |     | participants, care providers, outcome assessors, data analysts), and    |
| 19 |                |     | how <b>P8 P9</b>                                                        |
| 20 |                |     |                                                                         |
| 21 |                | 17b | If blinded, circumstances under which unblinding is permissible, and    |
| 22 |                |     | procedure for revealing a participant's allocated intervention during   |
| 23 |                |     | the trial                                                               |
| 24 |                |     |                                                                         |
| 25 |                |     |                                                                         |

### Methods: Data collection, management, and analysis

|    |                 |     |                                                                          |
|----|-----------------|-----|--------------------------------------------------------------------------|
| 26 |                 |     |                                                                          |
| 27 |                 |     |                                                                          |
| 28 | Data collection | 18a | Plans for assessment and collection of outcome, baseline, and other      |
| 29 | methods         |     | trial data, including any related processes to promote data quality (eg, |
| 30 |                 |     | duplicate measurements, training of assessors) and a description of      |
| 31 |                 |     | study instruments (eg, questionnaires, laboratory tests) along with      |
| 32 |                 |     | their reliability and validity, if known. Reference to where data        |
| 33 |                 |     | collection forms can be found, if not in the protocol <b>P2</b>          |
| 34 |                 |     |                                                                          |
| 35 |                 | 18b | Plans to promote participant retention and complete follow-up,           |
| 36 |                 |     | including list of any outcome data to be collected for participants who  |
| 37 |                 |     | discontinue or deviate from intervention protocols <b>P6 P7</b>          |
| 38 |                 |     |                                                                          |
| 39 | Data            | 19  | Plans for data entry, coding, security, and storage, including any       |
| 40 | management      |     | related processes to promote data quality (eg, double data entry;        |
| 41 |                 |     | range checks for data values). Reference to where details of data        |
| 42 |                 |     | management procedures can be found, if not in the protocol <b>P10</b>    |
| 43 |                 |     |                                                                          |
| 44 |                 |     |                                                                          |
| 45 | Statistical     | 20a | Statistical methods for analysing primary and secondary outcomes.        |
| 46 | methods         |     | Reference to where other details of the statistical analysis plan can be |
| 47 |                 |     | found, if not in the protocol <b>P10</b>                                 |
| 48 |                 |     |                                                                          |
| 49 |                 | 20b | Methods for any additional analyses (eg, subgroup and adjusted           |
| 50 |                 |     | analyses)                                                                |
| 51 |                 |     |                                                                          |
| 52 |                 | 20c | Definition of analysis population relating to protocol non-adherence     |
| 53 |                 |     | (eg, as randomised analysis), and any statistical methods to handle      |
| 54 |                 |     | missing data (eg, multiple imputation) <b>P10</b>                        |
| 55 |                 |     |                                                                          |
| 56 |                 |     |                                                                          |
| 57 |                 |     |                                                                          |
| 58 |                 |     |                                                                          |
| 59 |                 |     |                                                                          |
| 60 |                 |     |                                                                          |

**Methods: Monitoring**

- 1  
2  
3  
4  
5  
6  
7  
8  
9  
10  
11  
12  
13  
14  
15  
16  
17  
18  
19  
20  
21  
22
- |                 |     |                                                                                                                                                                                                                                                                                                                                                    |
|-----------------|-----|----------------------------------------------------------------------------------------------------------------------------------------------------------------------------------------------------------------------------------------------------------------------------------------------------------------------------------------------------|
| Data monitoring | 21a | Composition of data monitoring committee (DMC); summary of its role and reporting structure; statement of whether it is independent from the sponsor and competing interests; and reference to where further details about its charter can be found, if not in the protocol. <b>P7</b><br>Alternatively, an explanation of why a DMC is not needed |
|                 | 21b | Description of any interim analyses and stopping guidelines, including who will have access to these interim results and make the final decision to terminate the trial <b>P5</b>                                                                                                                                                                  |
| Harms           | 22  | Plans for collecting, assessing, reporting, and managing solicited and spontaneously reported adverse events and other unintended effects of trial interventions or trial conduct <b>P9 P10</b>                                                                                                                                                    |
| Auditing        | 23  | Frequency and procedures for auditing trial conduct, if any, and whether the process will be independent from investigators and the sponsor                                                                                                                                                                                                        |

**Ethics and dissemination**

- 23  
24  
25  
26  
27  
28  
29  
30  
31  
32  
33  
34  
35  
36  
37  
38  
39  
40  
41  
42  
43  
44  
45  
46  
47  
48  
49  
50  
51  
52  
53  
54  
55  
56  
57  
58  
59  
60
- |                               |     |                                                                                                                                                                                                                                  |
|-------------------------------|-----|----------------------------------------------------------------------------------------------------------------------------------------------------------------------------------------------------------------------------------|
| Research ethics approval      | 24  | Plans for seeking research ethics committee/institutional review board (REC/IRB) approval <b>P2</b>                                                                                                                              |
| Protocol amendments           | 25  | Plans for communicating important protocol modifications (eg, changes to eligibility criteria, outcomes, analyses) to relevant parties (eg, investigators, REC/IRBs, trial participants, trial registries, journals, regulators) |
| Consent or assent             | 26a | Who will obtain informed consent or assent from potential trial participants or authorised surrogates, and how (see Item 32)                                                                                                     |
|                               | 26b | Additional consent provisions for collection and use of participant data and biological specimens in ancillary studies, if applicable <b>P11</b>                                                                                 |
| Confidentiality               | 27  | How personal information about potential and enrolled participants will be collected, shared, and maintained in order to protect confidentiality before, during, and after the trial                                             |
| Declaration of interests      | 28  | Financial and other competing interests for principal investigators for the overall trial and each study site <b>P13</b>                                                                                                         |
| Access to data                | 29  | Statement of who will have access to the final trial dataset, and disclosure of contractual agreements that limit such access for investigators <b>P10</b>                                                                       |
| Ancillary and post-trial care | 30  | Provisions, if any, for ancillary and post-trial care, and for compensation to those who suffer harm from trial participation <b>P9 P10</b>                                                                                      |

|   |                         |     |                                                                                                                                                                                                                                                                                                |
|---|-------------------------|-----|------------------------------------------------------------------------------------------------------------------------------------------------------------------------------------------------------------------------------------------------------------------------------------------------|
| 1 | Dissemination<br>policy | 31a | Plans for investigators and sponsor to communicate trial results to participants, healthcare professionals, the public, and other relevant groups (eg, via publication, reporting in results databases, or other data sharing arrangements), including any publication restrictions <b>P11</b> |
| 2 |                         | 31b | Authorship eligibility guidelines and any intended use of professional writers                                                                                                                                                                                                                 |
| 3 |                         | 31c | Plans, if any, for granting public access to the full protocol, participant-level dataset, and statistical code                                                                                                                                                                                |

## Appendices

|   |                               |    |                                                                                                                                                                                                |
|---|-------------------------------|----|------------------------------------------------------------------------------------------------------------------------------------------------------------------------------------------------|
| 4 | Informed consent<br>materials | 32 | Model consent form and other related documentation given to participants and authorised surrogates <b>P5</b>                                                                                   |
| 5 |                               | 33 | Plans for collection, laboratory evaluation, and storage of biological specimens for genetic or molecular analysis in the current trial and for future use in ancillary studies, if applicable |

---

\*It is strongly recommended that this checklist be read in conjunction with the SPIRIT 2013 Explanation & Elaboration for important clarification on the items. Amendments to the protocol should be tracked and dated. The SPIRIT checklist is copyrighted by the SPIRIT Group under the Creative Commons "[Attribution-NonCommercial-NoDerivs 3.0 Unported](#)" license.
